# 1 Motor circuit function is stabilized during 2 postembryonic growth by anterograde 3 trans-synaptic Jelly Belly - Anaplastic 4 Lymphoma Kinase signaling 5

6 Phil-Alan Gärtig<sup>1</sup>, Aaron Ostrovsky<sup>1</sup>, Linda Manhart<sup>1</sup>, Carlo N. G. Giachello<sup>2</sup>,  
7 Tatjana Kovacevic<sup>1</sup>, Heidi Lustig<sup>3</sup>, Barbara Chwalla<sup>3</sup>, Sebastian Cachero<sup>4</sup>,  
8 Richard A. Baines<sup>2</sup>, Matthias Landgraf<sup>3</sup>, Jan Felix Evers<sup>1</sup>

9 <sup>1</sup> Centre for Organismal Studies, Heidelberg University, Im Neuenheimer Feld 230, 69120 Heidelberg,  
10 Germany

11 <sup>2</sup> Division of Neuroscience and Experimental Psychology, School of Biological Sciences,  
12 Faculty of Biology, Medicine and Health, University of Manchester, Manchester Academic  
13 Health Science Centre, Manchester, M13 9PL, UK

14 <sup>3</sup> Dept. of Zoology, University of Cambridge, Downing Street, Cambridge CB2 3EJ, United Kingdom

15 <sup>4</sup> MRC Laboratory of Molecular Biology, Francis Crick Avenue, Cambridge CB2 0QH, United  
16 Kingdom

17 Correspondence: [jan-felix.evers@cos.uni-heidelberg.de](mailto:jan-felix.evers@cos.uni-heidelberg.de)

18

## 19 Summary

20 The brain adapts to a changing environment or growing body size by structural growth and synaptic  
21 plasticity. Mechanisms studied to date promote synaptic growth between partner neurons, while  
22 negative counterparts that inhibit such interactions have so far remained elusive. Here, we investigate  
23 the role of Jeb-Alk signaling in coordinating motor circuit growth during larval stages of *Drosophila*.  
24 We quantify neuronal growth dynamics by intra-vital imaging, and synaptogenesis at nanometer  
25 resolution using endogenously labeled synaptic proteins, conditionally tagged with a fluorophore, and  
26 link changes in circuit anatomy with altered synaptic physiology and behavior. We find that loss of  
27 Jeb-Alk signaling leads to increased strengthening of synaptic excitation by developmental addition of  
28 additional postsynaptic but not pre-synaptic specializations. These changes ultimately lead to an

1 epilepsy-like seizure behavior. We thus demonstrate that trans-synaptic anterograde Jeb-Alk signaling  
2 acts to stabilize developmental plasticity and circuit function, and that it does so specifically during  
3 postembryonic growth.

## 4 Introduction

5 Neuronal circuits remain plastic and are continuously modified after birth in response to  
6 environmental change, thus supporting learning and memory, adaptation to a growing body or  
7 compensation for injury. To identify the molecular mechanisms that maintain nervous system function  
8 during adult life, but at the same time allowing neuronal circuits to stay plastic is, therefore, important.  
9 During phases of initial circuit formation and subsequent circuit plasticity, axonal and dendritic  
10 terminals are decorated with thin cellular protrusions, termed filopodia <sup>1-3</sup>. Filopodia undergo  
11 extensive dynamic outgrowth and retraction, effectively increasing the chance of pre- and  
12 postsynaptic arbors interacting, and thus of synaptogenesis. Observations in dissociated neuron  
13 culture suggest that dendritic filopodia, upon axonal contact, induce the formation of presynaptic  
14 specializations <sup>4</sup>; and equally within axonal filopodia, presynaptic release sites differentiate following  
15 contact with postsynaptic targets <sup>5-8</sup>. Such interactions between synaptic partners include non-  
16 neuronal cells, for example at neuromuscular junctions: filopodia from muscles (myopodia) are  
17 thought to aid partner selection through interactions with motorneuron growth cones <sup>9</sup>. Emerging  
18 immature circuits are adjusted through activity-dependent mechanisms, leading to selective  
19 stabilization of appropriate neuronal branches and synapses, while other synapses are dismantled and  
20 their branches retracted <sup>10-13</sup>. This initial phase of highly-plastic circuit wiring ultimately generates  
21 patterns of synaptic connections that support future network function, and which are subsequently  
22 maintained, even through phases of considerable growth. For example in *Drosophila*, synaptic patterns  
23 between identified partner neurons that were established during embryogenesis are maintained as  
24 the animal grows, scaling several-fold in synapse number, proportionally with neuronal arbor size <sup>14-</sup>  
25 <sup>16</sup>. The trans-synaptic signaling mechanisms that coordinate such scaling of pre- and postsynaptic  
26 partners during postembryonic circuit expansion are not known.

27 To date, pathways regulating the development of synaptic connectivity have primarily been studied  
28 during early stages of circuit formation, when synapses are first established and adjusted. Much less  
29 is known about later circuit growth. Here we focus on postembryonic stages in the *Drosophila* larva,  
30 during which neuronal growth and connectivity scale with substantive increases in body size, as also  
31 seen in vertebrates <sup>14-18</sup>. Specifically, we identified Jelly Belly (Jeb) – Anaplastic Lymphoma Kinase (Alk)  
32 signaling, as a mechanism to stabilize growth of neuronal networks. Previously shown to regulate

1 circuit formation in *Drosophila*, Jeb is released from axonal terminals, and detected by the receptor  
2 tyrosine kinase, Alk<sup>19-21</sup>. In the visual system of the adult fly, Jeb-Alk signaling controls axonal  
3 morphology<sup>20</sup> and neuronal survival<sup>21</sup>. At the larval neuromuscular junction this pathway negatively  
4 regulates synaptic coupling strength<sup>19</sup>. On the functional level, loss of Alk signaling can express as  
5 increased memory performance in adult flies<sup>22</sup>, mediated by dis-inhibition of protein synthesis<sup>23</sup>.  
6 However, the cell-biological and structural processes that underlie these alterations in network  
7 performance are not known.

8 Using novel techniques to label endogenous proteins, or conditionally remove gene expression by  
9 mutation in individual cells, we confirm that Jeb is a presynaptic anterograde signal that is detected  
10 by Alk on postsynaptic dendrites in the motor system. Intra-vital imaging of neuronal growth  
11 dynamics, and quantification of endogenous synaptic protein accumulation reveal that Alk activation  
12 in the postsynaptic compartment inhibits the developmental proliferation of postsynaptic, but not of  
13 presynaptic specializations independent of dendritic arbor size. Alk activation in dendrites also  
14 negatively regulates presynaptic filopodial dynamics via retrograde feedback. Performing intracellular  
15 patch clamp electrophysiology, we find that Jeb-Alk signaling deficient nervous systems undergo  
16 increased developmental strengthening of synaptic coupling, ultimately destabilizing circuit function  
17 as evident by epilepsy-like seizures evoked by electroshock.

18 Our data show that during postembryonic growth of neuronal circuits, presynaptic filopodia enhance  
19 the growth of prospective postsynaptic partner dendrites towards presynaptic sites. Once contact is  
20 established, trans-synaptic Jeb-Alk signaling limits further circuit growth and, thus, is essential to  
21 stabilize circuit function.

22

## 23 Results

### 24 Subcellular localization of Jeb and Alk in the fly motor system suggests a synaptic 25 anterograde signaling pathway

26 The regulation of synaptic coupling strength is essential for nervous system formation and function.  
27 At the larval NMJ, Jeb was previously identified as instrumental in setting synaptic coupling strength  
28<sup>19</sup>. In adult flies, the Jeb receptor Alk had been shown to impinge on memory performance<sup>22,23</sup>,  
29 suggesting potentially a similar role for Jeb-Alk in the CNS. To investigate this, we generated novel  
30 genetic reagents with which to visualize the subcellular localization of endogenous Jeb and Alk

1 proteins; and for conditionally removing gene function in single identified cells within the nervous  
2 system.

3 Jeb and Alk are prominently expressed in the larval CNS<sup>24-26</sup> (Fig S1). To identify the cell types  
4 expressing Jeb, we used a trojan GAL4 inserted into the Jeb locus (*jeb-T2A-GAL4*)<sup>27</sup> to report Jeb  
5 transcriptional activity, e.g., via a *UAS-nlsGFP* reporter. We find nlsGFP expression in neuronal cell  
6 bodies, but not glia cells (Fig S1B-G). To reveal subcellular Jeb distribution, we performed anti-Jeb  
7 immunohistochemistry on Jeb null mutant embryos in which we reinstated Jeb expression in a specific  
8 pre-motor interneuron IN<sub>lat</sub>, and two sensory neurons, ddaD and ddaE (genotype: *jeb<sup>2</sup>/Df(jeb)* ; *eyg-*  
9 *Gal4, UAS-jeb*) (Fig 1A-B). This revealed that Jeb accumulates at presynaptic release sites of both IN<sub>lat</sub>  
10 and sensory neurons, as evidenced by co-expression of the active zone marker Brp<sup>RFP</sup> (Fig 1B), though  
11 not in dendrites (data not shown).

12 We next aimed to reveal subcellular Alk localization. To this end we tagged Alk at its endogenous  
13 genomic 3' end with an inducible YPet fluorophore, which is conditional on FLP expression (Alk<sup>FOnYPet</sup> ,  
14 Fig 1C; details on dFLEX method see Fig S1H). We find that animals are homozygous viable and fertile  
15 for both, Alk<sup>FOnYPet</sup> (tag not induced) and constitutively tag-induced Alk<sup>YPet</sup>, following induction in the  
16 parental germline. Because Alk loss of function is postembryonic lethal<sup>28</sup>, we conclude that tagging  
17 endogenous Alk<sup>FOnYPet</sup> leaves the protein functional. Induction of Alk<sup>YPet</sup> in all neurons (via *nSyb-GAL4*,  
18 *UAS-Flp*) recapitulates an expression pattern previously identified by anti-Alk immunohistochemistry:  
19 Alk<sup>YPet</sup> strongly localizes to the neuropil within the larval ventral nerve cord (VNC) and, in the adult  
20 brain, prominently labels the mushroom body calyx (Fig S1I-J)<sup>22,23</sup>. Using this method we asked if Alk  
21 is expressed in glia cells (using *repo-GAL4, UAS-FLP*) (Fig S1K). We were unable to detect Alk<sup>YPet</sup>,  
22 suggesting that, at least until the early third instar larval stage (48h after larval hatching (ALH)), Alk  
23 expression and, thus, Jeb-Alk signaling is exclusively neuronal.

24 When the Alk<sup>YPet</sup> tag was induced in single RP2 motorneurons<sup>29</sup>, we detected Alk<sup>YPet</sup> fluorescence in  
25 the soma, primary neurite, and dendrites (Fig 1F), though not in axonal compartments (Fig 1F), nor at  
26 the neuromuscular junction (data not shown). Similarly, induction of the Alk<sup>YPet</sup> tag in IN<sub>lat</sub> (by *eyg-*  
27 *Gal4, UAS-Flp*) showed Alk<sup>YPet</sup> localization in the soma, but not in axonal compartments (Fig 1 E,E').  
28 These observations demonstrate that Alk protein localizes to postsynaptic, but not presynaptic,  
29 structures. Our protein localization data therefore imply that Jeb-Alk is an anterograde trans-synaptic  
30 signaling mechanism in central motor circuits, in agreement with previous findings in the visual system  
31 and the NMJ<sup>20,21,30</sup>.

## 1 [Jeb regulates filopodial number but not presynaptic specializations](#)

2 To determine the role of Jeb signaling in the CNS, we selectively removed Jeb function from selected  
3 cells using a genetically engineered conditional null allele. Briefly, we inserted an inducible artificial  
4 exon containing a translational stop codon and a transcription termination sequence into the  
5 endogenous Jeb locus (Fig 2A, methods), immediately preceding the region coding for the type A LDL  
6 receptor domain<sup>25</sup>. The design of this construct is similar to the dFLEX approach outlined above, but  
7 uses Bxb1 integrase and corresponding attBx/attPx sites<sup>31</sup> (Fig 2A, details in Fig S2A). We term this  
8 technique BOnStop (Bxb1 dependent on-switchable stop codon). A similar, Flp recombinase  
9 dependent technique, called FlpStop, has recently been shown to be highly effective<sup>32</sup>.

10 We find that un-induced *jeb*<sup>BOnStop</sup> / *jeb*<sup>2</sup> animals are fully viable and fertile, as would be expected for  
11 animals with one functional *jeb* allele. Embryos homozygous mutant for *jeb* fail to differentiate their  
12 visceral mesoderm, and therefore die during early larval stages<sup>24</sup>. This mesodermal phenotype, with  
13 failure of gut formation, is reproduced following conversion of *jeb*<sup>BOnStop</sup> to the *jeb*<sup>Stop</sup> mutant allele by  
14 expression of Bxb1 integrase in the early mesoderm (*jeb*<sup>BOnStop</sup> / *jeb*<sup>2</sup>; *Mef2*>*Bxb1*) (Fig S2B-C). This  
15 demonstrates that *jeb*<sup>BOnStop</sup> is a conditional *jeb* mutant allele, effectively induced in a cell and tissue-  
16 specific fashion by targeted Bxb1 integrase expression.

17 A previous report suggested that lack of Jeb-Alk function in the nervous system caused drastic  
18 locomotor defects, ultimately leading to death in late larval stages<sup>19</sup>. However, when we induce Jeb  
19 loss-of-function in all neurons (by *jeb*<sup>BOnStop</sup> / *jeb*<sup>2</sup>; *nSyb*>*Bxb1*), larvae survive until adult stages and do  
20 not show apparent locomotor deficits. Different roles have previously been attributed to Jeb signaling  
21 in the nervous system. At the larval NMJ, abrogation of synaptic Jeb anterograde signaling was  
22 reported to increase synaptic coupling strength, though without discernible structural change to  
23 presynaptic morphology<sup>19</sup>. In the adult visual system, however, cell-autonomous knock-down of *jeb*  
24 in photoreceptor neurons caused a marked increase in the number of filopodia and their overgrowth  
25 into adjacent synaptic non-target layers<sup>20</sup>.

26 Using our *jeb*<sup>BOnStop</sup> conditional loss of function allele, we sought to test the role of *jeb* in the larval  
27 VNC, specifically the locomotor network. Focusing on axonal and synaptic morphology of the  
28 identified IN<sub>lat</sub> interneurons (Fig 2B-E), we find that both pan-neuronal (via *jeb*<sup>BOnStop</sup> / *jeb*<sup>2</sup>; *nSyb*>*Bxb1*,  
29 4.35 ± 0.26 Brp puncta/10µm, n=11) and cell-autonomous *jeb* loss of function (using *jeb*<sup>BOnStop</sup> / *jeb*<sup>2</sup>;  
30 *eyg*>*Bxb1*, 4.42 ± 0.09 Brp puncta/10µm, n=8) in IN<sub>lat</sub> interneurons did not affect axonal presynaptic  
31 release site number over control (*jeb*<sup>BOnStop</sup> / *jeb*<sup>2</sup>; +, 4.26 ± 0.42 Brp puncta/10µm, n=7, visualized  
32 using *BrpShort*<sup>straw</sup><sup>33</sup>) (Fig 2F), consistent with previous findings at the NMJ. However, as in  
33 photoreceptor axons, these *jeb* loss of function manipulations caused an increase in the number of

1 filopodial side branches along the axon of the IN<sub>lat</sub> interneuron (Fig 2G, control:  $0.59 \pm 0.05$   
2 filopodia/ $\mu\text{m}$ , n=8; pan-neuronal:  $0.78 \pm 0.04$  filopodia/ $\mu\text{m}$ , n=12; cell-autonomous:  $0.98 \pm 0.04$   
3 filopodia/ $\mu\text{m}$ , n=19). Overall morphological characteristics of individual filopodia were not, however,  
4 altered (Fig 2H). We find that filopodia arise from bouton-like swellings, close to presynaptic release  
5 sites, but do not harbor markers indicative of either nascent presynaptic release sites (dSyd1::GFP; Fig  
6 S2F) or mature active zones (BrpShort<sup>straw</sup>; Fig 2B-E). This is in agreement with studies from developing  
7 tectal neurons in *Xenopus* embryos, where correlative live imaging-electron microscopy showed that  
8 such presynaptic filopodia do not contain immature nor mature synaptic release sites<sup>34</sup>.

9 As might be predicted from the postsynaptic localization of the receptor for Jeb, Alk, cell-autonomous  
10 inhibition of Alk receptor function in this IN<sub>lat</sub> interneuron (by *eyg-Gal4, UAS-Alk<sup>DN</sup>*) had no quantifiable  
11 impact on presynaptic axonal filopodia, confirming that Alk is not presynaptically active and arguing  
12 against autocrine signaling by Jeb through Alk (Fig 2G,  $0.65 \pm 0.03$  filopodia/ $\mu\text{m}$ , n=12).

13 Presynaptic filopodia are known to be short-lived, highly dynamic structures<sup>1,34</sup>. To quantify their  
14 dynamic behavior, we developed intra-vital imaging methods for monitoring neuronal growth in the  
15 VNC (Fig 3). To immobilize larvae for the imaging period we adapted use of the anesthetic desflurane  
16<sup>35</sup>, and a piezo-electric motor to gently compress larvae between two cover slips in a controlled and  
17 reproducible fashion, thus improving optical contact and increasing imaging depth. Expression levels  
18 of a membrane marker in IN<sub>lat</sub> allowed intra-vital imaging at 24 h ALH; the same animal was sacrificed  
19 24 h later, at 48 h ALH, its VNC dissected and imaged immediately (Fig 3A-B). Following individual  
20 filopodia thus showed that only 34.5% ( $\pm 0.05\%$ , n=4) persist from 24-48 h ALH in control animals (Fig  
21 3C), and 70.0% ( $\pm 0.01\%$ , n=4) of all filopodia emerge as new in this 24 h period (Fig 3D). Targeting  
22 cell-autonomous loss of *jeb* function to IN<sub>lat</sub> did not significantly decrease overall filopodial stability  
23 ( $28.9 \pm 0.01\%$ , n=4, Fig 3C), but slightly increases the proportion of newly formed relative to stable  
24 filopodia at 48h ALH ( $77.8 \pm 0.02\%$ , n=4, Fig 3D). Taken together, our results, in agreement with  
25 previous data, show that Jeb down-regulates the formation of axonal filopodia with minor impact on  
26 individual filopodial dynamics, though it does not obviously influence general axonal morphology or  
27 numbers of release sites (Fig 2B-E).

28 Exuberant growth of photoreceptor axons caused by loss of *jeb* has previously been interpreted as a  
29 defect in axonal targeting<sup>20</sup>. However, we find that IN<sub>lat</sub> axons successfully pathfind along the entire  
30 length of the *jeb* mutant VNC, suggesting that Jeb function is dispensable for guiding axonal growth,  
31 or spearheading the formation of presynaptic specializations. We therefore propose that presynaptic  
32 filopodia interact with postsynaptic dendrites of prospective partner neurons, as seen in *Xenopus*  
33 tectal neurons<sup>34</sup>. Such inter-neuronal contact facilitates signaling by presynaptic Jeb activating

1 dendritically localized Alk on the postsynaptic dendrite triggering a negative feedback signal that  
2 locally inhibits the formation of additional presynaptic filopodia, thus down-regulating locally further  
3 explorative filopodial behavior by the postsynaptic partner neuron.

#### 4 Alk signaling inhibits formation of postsynaptic specializations

5 Increased numbers of dynamic filopodia have been linked to synapse proliferation and synaptic  
6 plasticity in other systems<sup>3,36</sup>. Indeed, at the NMJ, loss of Jeb-Alk signaling causes strengthening of  
7 synaptic coupling<sup>19</sup>. We therefore asked how changes in the number of presynaptic filopodia, that  
8 result from changes in Jeb-Alk signaling, might impact on synapse formation between central neurons  
9 (Fig 2F-H). To this end we established the first verified postsynaptic reporter for central neurons in  
10 *Drosophila*; DNA fragmentation factor related protein 2 (Drep2) has previously been suggested to be  
11 postsynaptically localized in Kenyon cells<sup>37,38</sup>. Using expansion microscopy (ExM,<sup>39,40</sup> and a novel  
12 dFLEX<sup>YPet</sup> allele for tagging the endogenous active zone protein Bruchpilot (Brp<sup>FOnYPet</sup>, Fig S3A), we  
13 could confirm that Drep2 profiles (anti-Drep2) in the VNC are juxtaposed to Brp<sup>YPet</sup> marked presynaptic  
14 release sites. Interestingly, only a proportion of Brp<sup>YPet</sup> puncta are opposed to anti-Drep2 marked  
15 postsynaptic sites, and we could determine that the Drep2-positive release sites are opposed to  
16 cholinergic release sites; acetylcholine being the principal excitatory neurotransmitter in insect  
17 nervous systems (visualized using *Brp<sup>FOnYPet</sup>; ChaT-T2A-GAL4, UAS-FLP*) (Fig S3B). In contrast,  
18 GABAergic release sites are not paired with Drep2 in the motor system (*Brp<sup>FOnYPet</sup>; GAD-T2A-GAL4,*  
19 *UAS-FLP*) (Fig S3C). Thus, our data show, that in the larval CNS, Drep2 principally localizes to cholinergic  
20 postsynaptic specializations.

21 Next, we quantified cholinergic postsynaptic specializations that form on individual RP2 motoneurons  
22 (RP2>FLP) by selectively inducing dFLEX<sup>YPet</sup> tagging of endogenous Drep2 using a Drep2<sup>FOnYPet</sup> allele that  
23 we generated from a MiMIC site upstream of a *Drep2* coding intron, followed by induced homologous  
24 recombination (Fig S3D)<sup>41,42</sup>. Immunohistochemistry against the YPet fluorophore, followed by ExM,  
25 now allowed effective quantification of cholinergic postsynaptic specializations in RP2 motoneurons,  
26 as reported by Drep2<sup>YPet</sup> profiles, opposed to Brp containing presynaptic release sites<sup>20</sup> (anti-GFP used  
27 to amplify YPet signal; Fig 4A-C). As expected for a postsynaptic protein, we find that Drep2 coincides  
28 with the RP2 membrane label (myr::tdTomato), but juxtaposes presynaptic Brp labelled sites at  
29 distance of 180nm (Fig 4D), in close agreement with previously reported distances for the Brp C-  
30 Terminus relative to the synaptic cleft<sup>43</sup>. Importantly, we found that attempts of marking postsynaptic  
31 sites by overexpression of a GFP tagged version of Drep2 (*UAS-Drep2<sup>GFP</sup>*) in RP2 motoneurons causes  
32 abnormal dendrite development. This appears to be an over-expression artefact, which is  
33 circumvented when tagging the endogenous protein using Drep2<sup>FOnYPet</sup> (Fig S3E-G, RN2FlpOut: 847.42  
34  $\pm$  27.19  $\mu$ m; RP2>Drep2<sup>FOnYPet</sup>: 792.09  $\pm$  18.56  $\mu$ m, RP2>Drep2<sup>GFP</sup>: 669.95  $\pm$  21.86  $\mu$ m).

1 We find that cell-autonomous inhibition of Alk in RP2 motorneurons, through expression of a well  
2 characterized dominant negative acting form (*UAS-Alk<sup>DN</sup>*<sup>20</sup>), causes a notable 1.3-fold increase  
3 (RP2>Alk<sup>DN</sup>: 484.00 ± 30.58, n=4) of Drep2 puncta as compared to control (364.67 ± 4.82, n=3, Fig  
4 4F,H). When Jeb-Alk signaling is removed throughout the nervous system (*jeb<sup>BOncStop</sup>/jeb<sup>2</sup>; nSyb-Bxb1*:  
5 616.40 ± 46.68, n=5; Fig 4G,H) this increase in postsynaptic specializations is further enhanced 1.4 fold  
6 (+/*jeb<sup>2</sup>; nSyb-Bxb1*: 440.00 ± 23.27, n=3; Fig. 4G,H). Interestingly, these increases in postsynaptic sites  
7 in RP2 motorneurons, following cell-autonomous Alk inhibition, only manifest during postembryonic  
8 life, and are not evident at hatching (0 h ALH, Fig S3H, control: 72.67 ± 4.81; RP2>Alk<sup>DN</sup>: 73.67 ± 4.48).

9 It is reasonable to suppose that an increase in postsynaptic specializations might require a  
10 concomitant increase in presynaptic sites. However in *Drosophila*, most central synapses are polyadic,  
11 with multiple postsynaptic partners opposed to a single presynaptic specialization<sup>44-46</sup>. Because we  
12 do not find loss of Jeb-Alk signaling impacting the number of presynaptic specializations (Fig 2F), yet  
13 leading to increases in postsynaptic sites within motorneuron dendrites (Fig 4H), our data suggest that  
14 this signaling pathway might modulate the number of postsynaptic specializations that pair up with  
15 any one presynaptic release site.

16 In mouse pyramidal neurons synaptogenesis appears competitive, such that less tenacious synapses  
17 will be withdrawn in favor of stronger ones, and neurons that outcompete others proliferate more  
18 synapses and grow a bigger dendrite<sup>47</sup>. Here, we showed that Alk signaling deficient motorneurons  
19 markedly increase the numbers of synaptic input sites they form, irrespective of whether just one, or  
20 all neurons (i.e. pan-neuronal) lost Alk signaling. This suggests that Alk does not influence competitive  
21 performance, but that proliferation of postsynaptic sites is regulated cell-autonomously by Alk  
22 activation.

### 23 [Jeb-Alk signaling inhibits developmental strengthening of synaptic excitation and](#) 24 [stabilizes circuit function](#)

25 Increased synaptic connectivity, as seen at the anatomical level, suggests a corresponding increase in  
26 synaptic coupling strength. To test this directly, we performed intracellular recordings from RP2  
27 motorneurons to quantify rhythmic cholinergic excitatory synaptic inputs that occur during fictive  
28 crawling activity. These excitatory currents are termed spontaneous rhythmic currents (SRC)<sup>48</sup>.  
29 Indeed, we find that SRCs recorded in RP2, in Jeb-/- show significantly increased duration indicative  
30 of heightened synaptic coupling (Fig 5A-C; *jeb<sup>BOncStop</sup>/jeb<sup>2</sup>; +*: 0.51 ± 0.04 s, n=10; *jeb<sup>BOncStop</sup>/jeb<sup>2</sup>; nSyb-*  
31 *Bxb1*: 1.15 ± 0.06 s, n = 10). SRC frequency (Fig 5D, *jeb<sup>BOncStop</sup>/jeb<sup>2</sup>; +*: 15.83 ± 2.77 min<sup>-1</sup>, n=10;  
32 *jeb<sup>BOncStop</sup>/jeb<sup>2</sup>; nSyb-Bxb1*: 12.23 ± 3.02 min<sup>-1</sup>, n=10) and SRC current density (Fig 5E, *jeb<sup>BOncStop</sup>/jeb<sup>2</sup>; +*:  
33 35.14 ± 3.30 pA/pF, n=10; *jeb<sup>BOncStop</sup>/jeb<sup>2</sup>; nSyb-Bxb1*: 43.07 ± 2.69 pA/pF, n=10) are not significantly



1 affected. This outcome is consistent with increased numbers of postsynaptic specializations, that we  
2 also observe in a *Jeb*<sup>-/-</sup> nervous systems. Increased SRC duration is a characteristic of *Drosophila*  
3 models for epilepsy<sup>48</sup>. Such larvae exhibit prolonged duration of seizure recovery following  
4 electroshock. We find that seizure recovery time approximately doubles in pan-neuronal *Jeb*<sup>-/-</sup> larvae  
5 at 48 h ALH compared to control (Fig 5F, *jeb*<sup>BO<sub>n</sub>Stop</sup>/*jeb*<sup>2</sup>; +: 107.2 ± 7.72 s, n=30; *jeb*<sup>BO<sub>n</sub>Stop</sup>/*jeb*<sup>2</sup>; *nSyb*-  
6 *Bxb1*: 212.9 ± 11.13 s, n=30). By contrast, removal of *Jeb* function from all neurons does not  
7 significantly affect synaptic excitation (SRC duration) at larval hatching (0h ALH, Fig 5G-K), in line with  
8 *Jeb*-Alk signaling not affecting numbers of postsynaptic specializations during embryonic development  
9 (Fig 4G-H, Fig S3H).

10 We conclude that the developmental over-proliferation of cholinergic postsynaptic specializations, as  
11 seen at the anatomical level, in *Jeb*-Alk deficient nervous systems (Fig 4) gives rise to increased  
12 synaptic excitation to RP2 motor neurons, and results in a motor circuit with decreased ability to  
13 recover from seizure. Thus, *Jeb*-Alk signaling is required to promote stability of circuit function and  
14 resilience.

## 15 Cell-autonomous and pan-neuronal Alk inhibition result in distinct dendritic growth 16 phenotypes.

17 Dendrites are the substrate on which postsynaptic specializations form. Therefore, synapse  
18 proliferation and dendritic structural elaboration are often thought of as intimately linked<sup>49</sup>. Indeed,  
19 synaptogenesis can stabilize nascent axonal and dendritic branches and thus promote structural  
20 expansion of synaptic terminals<sup>1,2</sup> (synaptotropic growth, reviewed in<sup>50</sup>). In the case of RP2  
21 motoneurons, as the animal grows, their dendrites enlarge and proportionately increase the number  
22 of supported presynaptic inputs<sup>14,15</sup>. However, there are observations that question a strict co-  
23 regulation of dendritic and synaptic growth. For example, during network formation, experimentally  
24 increased availability of presynaptic sites actually results in reduced dendritic arbors, suggesting that  
25 synapse formation can also inhibit dendritic growth, at least during early developmental stages<sup>51</sup>.

26 To test the interdependency between synapse formation and dendritic elaboration, we first analyzed  
27 dendritic arbor morphology of RP2 motoneurons (Fig 1A yellow) in pan-neuronal *jeb*<sup>-/-</sup> mutant  
28 animals (*jeb*<sup>BO<sub>n</sub>Stop</sup>/*jeb*<sup>2</sup>; *nSyb*-*Bxb1*). We found that total dendritic length (TDL) of RP2 motoneurons  
29 was significantly increased in pan-neuronal *jeb*<sup>-/-</sup> mutant animals (1099.49 ± 26.20 μm) compared to  
30 control (959.91 ± 12.56 μm, Fig 6A-F), in line with the synaptotropic growth hypothesis<sup>52</sup>. Gross  
31 morphology and targeting of dendrites to the characteristic RP2 territory were normal, indicating that  
32 dendritic pathfinding was unaffected. Pan-neuronal inhibition of Alk (*elav-Gal4*, *UAS-Alk<sup>DN</sup>*) caused a  
33 comparable increase in TDL (Fig 6A-F, 1193.23 ± 79.50 μm), confirming that Alk is the only *Jeb*

1 receptor, at least in neurons. Thus, pan-neuronal loss of Jeb-Alk signaling induces a strong increase in  
2 presynaptic filopodia (Fig 2G), increased overall length of postsynaptic dendritic arbors and increased  
3 postsynaptic connectivity. The number of presynaptic specializations, however, remains unaffected.

4 The increased dendritic length in Jeb-Alk deficient nervous systems might be a cell-autonomous  
5 consequence of the lack of postsynaptic Alk activation. Alternatively, this postsynaptic overgrowth  
6 might be regulated at the tissue level. To discriminate between these two possibilities, we targeted  
7 Alk<sup>DN</sup> expression to single RP2 motoneurons (Fig 6G-I). We found that inhibition of Alk in single cells  
8 caused a significant reduction of RP2 TDL as compared to control (control:  $847.42 \pm 27.19 \mu\text{m}$ , n=6;  
9 RP2>AlkDN:  $589.09 \pm 24.84 \mu\text{m}$ , n=4). This stunted dendritic growth phenotype could be partially  
10 rescued by co-expression of full length Alk (Fig 3I+K,  $695.25 \pm 25.56 \mu\text{m}$ ), confirming the specificity of  
11 Alk<sup>DN</sup> for Alk signaling. This observation shows that Jeb-Alk signaling cell-autonomously promotes  
12 dendritic growth; however, global abrogation of Alk activation at the tissue-level changes intercellular  
13 interactions toward stimulating RP2 motoneuron growth. Throughout, Jeb acts exclusively in  
14 anterograde signaling, further underlined by the fact that cell-autonomous knockdown of *jeb* in RP2  
15 motoneurons (*jeb<sup>BOnStop</sup> / jeb<sup>2</sup>; RP2>Bxb1*,  $845.51 \pm 18.85 \mu\text{m}$ ) does not impact on normal dendritic  
16 growth (Fig 6J).

17

## 18 Jeb-Alk signaling regulates elaboration of dendritic arbors exclusively during 19 postembryonic circuit growth

20 We showed above that experimental Jeb-Alk inhibition non-cell autonomously leads to an increase in  
21 presynaptic filopodia, suggesting that normally Alk activation by Jeb acts to locally reduce the number  
22 of presynaptic filopodia (Fig 2G). Filopodial protrusions can form pioneering contacts with neighboring  
23 cells, thus speeding up target discovery and promoting synaptogenesis between partners<sup>9,34,36</sup>.  
24 Consequently, we consider that interactions between presynaptic filopodia and nascent postsynaptic  
25 dendritic branches are capable of promoting dendritic arbor elaboration. Widespread formation of  
26 super-numerous presynaptic filopodia, as seen with pan-neuronal loss of *jeb*, would thus not only  
27 result in increased dendritic complexity, as we have observed, but also heightened growth dynamics.  
28 In contrast, Alk inhibition in individual RP2 motoneurons is unlikely to cause effects on overall  
29 presynaptic filopodial dynamics and therefore is similarly unlikely to result in changes to dendritic  
30 growth dynamics. However, cell autonomous inhibition of Alk activity in single motoneurons leads to  
31 significantly more excitatory cholinergic inputs forming on these, which might in turn result in reduced  
32 dendritic growth, as previously shown<sup>51</sup>.

1 To test the validity of this model we set out to quantify the dynamics of dendritic growth by intra-vital  
2 microscopy of individual RP2 dendritic arbors in transiently anaesthetized larvae immediately after  
3 hatching, at 0 h ALH, followed up in 24 h intervals, at 24 and 48 h ALH (early second and third instar  
4 stages, respectively; the last time point in acutely dissected nerve cords, Fig 7A). We find that RP2  
5 dendrites double in size every 24 h, consistent with previous findings <sup>15</sup>.

6 Relative to controls, not subjected to intra-vital imaging and recorded at 48 h ALH, we observed a  
7 slight, but non-significant reduction in total dendritic length following this intra-vital imaging sequence  
8 (<5%, Fig 7B, control:  $847.42 \pm 27.19 \mu\text{m}$ ; anesthetized:  $807.95 \pm 36.52 \mu\text{m}$ ). We therefore conclude  
9 that larvae subjected to repeated anesthesia display normal dendritic development. Importantly, at  
10 the time of larval hatching (0 h ALH), RP2 dendritic arbor size did not differ between control condition  
11 ( $184.99 \pm 6.77 \mu\text{m}$ ), cell autonomous inhibition of Alk ( $193.48 \pm 8.29 \mu\text{m}$ ) or pan-neuronal loss of *jeb*  
12 function ( $186.25 \pm 4.58 \mu\text{m}$ ) (Fig 7C). However, during subsequent postembryonic stages, cell  
13 autonomous inhibition of Alk leads to smaller RP2 dendritic arbors, 17% reduction in TDL at 24 h ALH  
14 (control:  $404.40 \pm 23.58 \mu\text{m}$ , RP2>Alk<sup>DN</sup>:  $334.91 \pm 16.35 \mu\text{m}$ ), and this difference is maintained at 17%  
15 until 48 h ALH (control:  $807.95 \pm 36.52 \mu\text{m}$ , RP2>Alk<sup>DN</sup>:  $673.81 \pm 42.774 \mu\text{m}$ ). Similarly, pan-neuronal  
16 loss of *jeb* causes a slight though statistically not significant increase in RP2 dendritic length at 24 h  
17 ALH (8%,  $435.2 \pm 20.77 \mu\text{m}$ ); this then propagates to a significant 31% increased TDL by 48 h ALH  
18 ( $1056.91 \pm 69.18 \mu\text{m}$ ).

19 This shows that neuronal Jeb-Alk signaling does not regulate dendritic growth during initial circuit  
20 formation in the embryo, when activity dependent mechanisms likely play a dominant role in shaping  
21 nascent motor circuitry <sup>48,53</sup>; but it is during post-embryonic larval stages that Jeb-Alk signaling  
22 regulates the rate of dendritic growth.

### 23 Changes in presynaptic filopodial dynamics are paralleled by changes in dendritic 24 growth behavior

25 To enable net growth, stabilization of nascent neuronal branches must be greater than branch  
26 retraction rates. To quantify the dynamics that give rise to dendritic arbor growth, we tracked  
27 individual dendritic branches from 0 h to 48 h ALH and determined rates of branch formation,  
28 retraction and stabilization (Fig 7D-G). New branches are added throughout the dendritic tree (Fig 7D-  
29 E, 0-24 h:  $134.14 \pm 14.43$ , n=7; 24-48 h:  $177.00 \pm 15.25$ , n=7). Importantly,  $61.74 \pm 2.72$  % of branches  
30 formed from 0h to 24h ALH persist until 48h ALH in control larvae (Fig 7F). This shows that nascent  
31 dendritic branches are considerably more stable than presynaptic filopodia of IN<sub>lat</sub>, of which only  
32 34.5% are maintained during this period (Fig 3).

1 We next tested the dendritic growth dynamics in animals with pan-neuronal loss of *jeb*. Here, RP2  
2 dendrites show a markedly elevated rate of branch formation (Fig 7D; 24-48 h:  $305.75 \pm 27.61$   
3 branches,  $n=4$ ) and at the same time reduced stabilization probability ( $49.95 \pm 2.49\%$ ,  $n=4$ ), as  
4 compared to dendrites from controls (Fig 7F). Despite this increased rate of branch formation, the  
5 total length of stable dendritic branches, that had formed in the first 24 hours of larval live (0-24 h  
6 ALH) and persisted for the next 24 hours (until 48 h ALH), is slightly shorter than in control (Fig 7G,  
7 control:  $164.47 \pm 11.13 \mu\text{m}$ ,  $n=7$ ; pan-neuronal *jeb* mutant:  $128.78 \pm 11.13 \mu\text{m}$ ,  $n=4$ ). Thus, stability of  
8 RP2 dendrites is reduced in a nervous system mutant for *jeb*. In contrast, cell autonomous inhibition  
9 of Alk, in single RP2 motoneurons, reduced formation of new branches (Fig 7D, 0-24h:  $86.43 \pm 10.14$   
10 branches,  $n=7$ ; 24-48 h:  $131.71 \pm 11.80$  branches,  $n=7$ ), without significant effect on their stabilization  
11 probability (Fig 7F,  $59.24 \pm 1.80\%$ ,  $n=7$ ).

12 In conclusion, we find that dendritic branch formation and retraction dynamics scale with overall  
13 presynaptic filopodial dynamics, and that these are not cell-autonomously regulated by Alk signaling.  
14 Formation of postsynaptic sites, in turn, likely acts inhibitory on the formation of new dendritic  
15 branches, possibly by reducing sensitivity to interactions with presynaptic filopodia.

## 16 Discussion

17 Animals need to maintain neuronal circuit function while adapting to a body growing in size or  
18 changing environmental conditions. Mechanisms that regulate the initial assembly of neuronal circuits  
19 have been studied intensively. However, we know much less about how growth is regulated during  
20 post-embryonic phases, following the integration of neurons into functional circuits. Here we show  
21 that trans-synaptic *Jeb*-*Alk* signaling acts to slow motor circuit growth upon synapse formation in  
22 *Drosophila* larvae, and as a result, maintains functional stability during postembryonic growth. *Jeb* is  
23 released from cholinergic terminals and activates postsynaptic *Alk*, which negatively regulates the  
24 proliferation of post-, but not pre-, synaptic specializations. *Alk* activation by *Jeb* also seems to elicit  
25 an as yet uncharacterized retrograde signal that inhibits the formation of presynaptic filopodia. We  
26 find that dendritic structural plasticity is promoted by presynaptic filopodia, but repressed by  
27 increasing numbers of postsynaptic specializations.

28 Based on our observations, we propose a model for how postembryonic growth is coordinated  
29 between synaptic partner neurons, namely that presynaptic filopodia enhance dendritic growth. Once  
30 a dendritic protrusion contacts a presynaptic release site, presynaptic *Jeb* induces dendritic *Alk*  
31 activation. This *Alk* activation then acts to inhibit addition or differentiation of further postsynaptic  
32 specializations nearby. It also elicits retrograde signaling that dampens presynaptic filopodial  
33 dynamics, thus curbing presynaptic exploratory contacts in the immediate vicinity. Our data point to

1 Alk-receptor activation being interpreted locally at a forming synaptic contact, therefore repressing  
2 nearby formation of other contacts and thus reducing the density of postsynaptic specializations along  
3 a dendritic arbor.

#### 4 [Distinct mechanisms control initial circuit assembly and later growth](#)

5 Strengthening of synaptic drive to motoneurons, during development, is achieved by increasing the  
6 number of synaptic connections (this study, also <sup>14,15</sup>). The mechanisms that maintain network  
7 function during postembryonic life are likely different from those that allow function to emerge  
8 initially during an identified early critical period of heightened activity-regulated plasticity <sup>48,54,55</sup>.  
9 These emergent network configurations cannot be overruled or reprogrammed through later  
10 interference with network activity <sup>54</sup>. Here, we show that Jeb-Alk signaling impacts on dendritic  
11 elaboration and connectivity, but only during the post-embryonic growth phase, where it acts to  
12 maintain stability of circuit function. The nature of the switch from initial network assembly  
13 mechanisms to subsequent programs of maintenance and stability during periods of growth and  
14 expansion is not known. One candidate is developmentally and nutritionally regulated steroid  
15 hormone signaling, which we previously showed gates postembryonic neuronal growth <sup>15</sup>. Future  
16 work targeting the upstream mechanisms of Alk and steroid signaling might reveal possible  
17 therapeutic targets to lift the rigidity of circuit maintenance, and re-instate embryonic flexibility to  
18 support recovery from, for example, brain damage or neurodegenerative disorders.

#### 19 [Equilibrated circuit growth to maintain circuit function](#)

20 During postembryonic circuit growth, synaptic partners expand their neuronal arbors and synaptic  
21 sites by equilibrated addition of pre- and postsynaptic specializations, thus preserving embryonically  
22 established patterns of synaptic connectivity throughout postembryonic circuit growth <sup>14,16</sup>.  
23 Therefore, equilibrated expansion of such synaptic patterns likely underlies the maintenance of circuit  
24 function during organismal growth <sup>56</sup>. Reciprocal growth promotion alone is sufficient to equilibrate  
25 cell proliferation of a two-cell network. Negative feedback stabilizes this reciprocal promotion and  
26 thus prevents uncontrolled over-proliferation <sup>57</sup>. Contrary to this <sup>19</sup>, we find that Jeb mutant nervous  
27 systems support normal crawling performance. This demonstrates that overall network function is  
28 maintained despite massive over-proliferation of cholinergic postsynaptic specializations in a nervous  
29 system entirely mutant for Jeb-Alk signaling (Fig 3). In the same vein, loss of Alk function in adult  
30 *Drosophila* mushroom body increases memory performance, demonstrating that learning circuits are  
31 not impaired, by contrast performance is increased <sup>23</sup>. We thus speculate that Jeb-Alk signaling does  
32 not severely impact synaptic partner specificity between neurons within a circuit. However,  
33 continuous over-growth of neuronal circuits is space- and energy consuming, and we show that it

1 leads to increased cholinergic excitation paralleled with reduced functional resilience, as manifested  
2 by significantly prolonged durations required for recovery from electro-shock induced seizures, Fig 5.  
3 We therefore suggest that Jeb-Alk signaling might operate to keep positive growth interactions at bay,  
4 and thus act to maintain and stabilize embryonically established circuit function possibly as a negative  
5 feedback signal to synapse formation.

## 6 Presynaptic filopodia evoke postsynaptic structural plasticity

7 At the developmental stage when neuronal projections have arrived in common meeting regions and  
8 synaptogenesis commences, axonal and dendritic filopodia change their role from steering neurite  
9 outgrowth, to negotiating synapse placement <sup>4,12,58,59</sup>. Increased filopodial dynamics correlate with  
10 phases of heightened synaptogenesis during postembryonic development <sup>3</sup>, and factors that  
11 strengthen synaptic coupling also induce an increase in filopodia formation <sup>60,61</sup>. These data suggest  
12 that filopodial activity may be crucial to drive circuit plasticity and synaptogenesis. Studies in  
13 dissociated neuron culture revealed that axonal filopodia frequently contain presynaptic proteins and  
14 synaptic vesicles, and are able to quickly assemble presynaptic specializations upon contacting a target  
15 cell <sup>5,6</sup>. Similarly, dendritic filopodia can induce presynaptic differentiation <sup>4</sup>, then stabilize to  
16 transform into postsynaptic spines <sup>12</sup>. In intact *Xenopus* tectum, however, the majority of presynaptic  
17 release sites emerge on stable axonal branches, whereas postsynaptic specializations readily form  
18 within dynamic dendritic branches <sup>34</sup>. Our data from *Drosophila* postembryonic motor circuit growth  
19 support the latter scenario: 1) dynamic IN<sub>lat</sub> axonal filopodia are empty of both early and late  
20 molecular markers of presynaptic differentiation (dSyd1, and Brp respectively); and 2) in a *jeb*<sup>-/-</sup>  
21 mutant nervous system, supernumerary postsynaptic specializations form within motorneuron  
22 dendrites despite significantly increased dendritic turnover. We therefore suggest that axonal and  
23 dendritic filopodia play conceptually different roles during circuit growth: presynaptic filopodia induce  
24 sprouting of dendritic filopodia and thus attract dendritic growth towards presynaptic specializations;  
25 subsequently, postsynaptic specializations form.

26 Taken together, our findings suggest fundamentally different behaviors for pre- *versus* postsynaptic  
27 specializations during postembryonic circuit growth: proliferation of presynaptic specializations is  
28 fairly static, while postsynaptic specializations readily form and retract. This could explain why, in this  
29 system, the number of presynaptic release sites of the IN<sub>lat</sub> axons shows much less variability (Fig 2)  
30 than connectivity patterns with identified postsynaptic partners <sup>14</sup>.

## 31 Dendritic shape, synapse placement and behavioral output

32 Dendrites, due to their geometry, are inherently endowed with mechanisms for weighting and  
33 integrating synaptic input depending on its localization along the dendritic arbor. Thus dendritic shape

1 and synapse placement can have a strong influence on neuronal computational performance  
2 (reviewed in <sup>62,63</sup>). However, recent studies in the stomatogastric ganglion of crabs showed that the  
3 specific tapering of dendritic branches can effectively compact elaborate dendritic structures to a  
4 uniform electrotonic compartment, thus strongly reducing the impact of synapse positioning along a  
5 dendritic arbor on signal integration and ultimately spike output <sup>64-66</sup>. Conversely, experimentally  
6 reduced dendritic arbor complexity of *Drosophila* flight motoneurons still supports astonishingly  
7 normal neuronal performance, and only behaviors requiring fine precision appear to be negatively  
8 affected <sup>67</sup>. Here we show that a drastic increase in dendritic arbor size, and numbers of synaptic  
9 connections, as caused by pan-neuronal abrogation of Jeb-Alk signaling (Fig 4 and 5) did not produce  
10 noticeable motor defects. This demonstrates that also in the *Drosophila* larval motor system, the fine  
11 details of dendritic morphology may not be of significance for the computation of adequate neuronal  
12 output. In conclusion, we propose that proportional growth of dendrites leads to a proportional  
13 strengthening of existing synaptic patterns; whereas changes in the positioning of dendritic subtrees  
14 would alter the choice of synaptic partner neurons and thus also the balance between those.

## 15 References

- 16 1. Meyer, M. P. & Smith, S. J. Evidence from in vivo imaging that synaptogenesis guides the  
17 growth and branching of axonal arbors by two distinct mechanisms. *J. Neurosci.* **26**, 3604–  
18 3614 (2006).
- 19 2. Niell, C. M., Meyer, M. P. & Smith, S. J. In vivo imaging of synapse formation on a growing  
20 dendritic arbor. *Nat Neurosci* **7**, 254–260 (2004).
- 21 3. Sheng, C. *et al.* Experience-dependent structural plasticity targets dynamic filopodia in  
22 regulating dendrite maturation and synaptogenesis. *Nat Comms* **9**, 3362 (2018).
- 23 4. Ziv, N. E. & Smith, S. J. Evidence for a role of dendritic filopodia in synaptogenesis and spine  
24 formation. *Neuron* **17**, 91–102 (1996).
- 25 5. Matteoli, M., Coco, S., Schenk, U. & Verderio, C. Vesicle turnover in developing neurons: how  
26 to build a presynaptic terminal. *Trends Cell Biol.* **14**, 133–140 (2004).
- 27 6. Kraszewski, K. *et al.* Synaptic vesicle dynamics in living cultured hippocampal neurons  
28 visualized with CY3-conjugated antibodies directed against the luminal domain of  
29 synaptotagmin. *Journal of Neuroscience* **15**, 4328–4342 (1995).
- 30 7. Ahmari, S. E., Buchanan, J. & Smith, S. J. Assembly of presynaptic active zones from  
31 cytoplasmic transport packets. *Nat Neurosci* **3**, 445–451 (2000).
- 32 8. Yumoto, N., Kim, N. & Burden, S. J. Lrp4 is a retrograde signal for presynaptic differentiation  
33 at neuromuscular synapses. *Nature* **489**, 438–442 (2012).
- 34 9. Kohsaka, H. & Nose, A. Target recognition at the tips of postsynaptic filopodia: accumulation  
35 and function of Capricious. *Development* **136**, 1127–1135 (2009).
- 36 10. Winnubst, J., Cheyne, J. E., Niculescu, D. & Lohmann, C. Spontaneous Activity Drives Local  
37 Synaptic Plasticity In Vivo. *Neuron* **87**, 399–410 (2015).
- 38 11. Wong, W. T., Faulkner-Jones, B. E., Sanes, J. R. & Wong, R. O. Rapid dendritic remodeling in  
39 the developing retina: dependence on neurotransmission and reciprocal regulation by Rac  
40 and Rho. *J. Neurosci.* **20**, 5024–5036 (2000).
- 41 12. Portera-Cailliau, C., Pan, D. T. & Yuste, R. Activity-regulated dynamic behavior of early  
42 dendritic protrusions: evidence for different types of dendritic filopodia. **23**, 7129–7142  
43 (2003).

- 1 13. Ding, M., Chao, D., Wang, G. & Shen, K. Spatial regulation of an E3 ubiquitin ligase directs  
2 selective synapse elimination. *Science* **317**, 947–951 (2007).
- 3 14. Couton, L. *et al.* Development of connectivity in a motoneuronal network in *Drosophila*  
4 larvae. *Curr Biol* **25**, 568–576 (2015).
- 5 15. Zwart, M. F., Randlett, O., Evers, J. F. & Landgraf, M. Dendritic growth gated by a steroid  
6 hormone receptor underlies increases in activity in the developing *Drosophila* locomotor  
7 system. *Proc Natl Acad Sci USA* **110**, E3878–87 (2013).
- 8 16. Gerhard, S., Andrade, I., Fetter, R. D., Cardona, A. & Schneider-Mizell, C. M. Conserved neural  
9 circuit structure across *Drosophila* larval development revealed by comparative  
10 connectomics. *Elife* **6**, (2017).
- 11 17. Voyvodic, J. T. Development and regulation of dendrites in the rat superior cervical ganglion.  
12 **7**, 904–912 (1987).
- 13 18. Purves, D. & Lichtman, J. W. Geometrical differences among homologous neurons in  
14 mammals. *Science* **228**, 298–302 (1985).
- 15 19. Rohrbough, J., Kent, K. S., Broadie, K. & Weiss, J. B. Jelly Belly trans-synaptic signaling to  
16 anaplastic lymphoma kinase regulates neurotransmission strength and synapse architecture.  
17 *Dev Neurobiol* **73**, 189–208 (2012).
- 18 20. Bazigou, E. *et al.* Anterograde Jelly belly and Alk Receptor Tyrosine Kinase Signaling Mediates  
19 Retinal Axon Targeting in *Drosophila*. *Cell* **128**, 961–975 (2007).
- 20 21. Pecot, M. Y. *et al.* Sequential axon-derived signals couple target survival and layer specificity  
21 in the *Drosophila* visual system. *Neuron* **82**, 320–333 (2014).
- 22 22. Gouzi, J. Y. *et al.* The Receptor Tyrosine Kinase Alk Controls Neurofibromin Functions in  
23 *Drosophila* Growth and Learning. *PLoS Genet* **7**, e1002281 (2011).
- 24 23. Gouzi, J. Y., Bouraimi, M., Roussou, I. G., Moressis, A. & Skoulakis, E. M. C. The *Drosophila*  
25 Receptor Tyrosine Kinase Alk constrains long-term memory formation. *Journal of*  
26 *Neuroscience* 0784–18 (2018). doi:10.1523/JNEUROSCI.0784-18.2018
- 27 24. Weiss, J. B., Suyama, K. L., Lee, H. H. & Scott, M. P. Jelly belly: a *Drosophila* LDL receptor  
28 repeat-containing signal required for mesoderm migration and differentiation. *Cell* **107**, 387–  
29 398 (2001).
- 30 25. Lee, H.-H., Norris, A., Weiss, J. B. & Frasch, M. Jelly belly protein activates the receptor  
31 tyrosine kinase Alk to specify visceral muscle pioneers. *Nature* **425**, 507–512 (2003).
- 32 26. Englund, C. *et al.* Jeb signals through the Alk receptor tyrosine kinase to drive visceral muscle  
33 fusion. *Nature* **425**, 512–516 (2003).
- 34 27. Diao, F. *et al.* Plug-and-Play Genetic Access to *Drosophila* Cell Types using Exchangeable Exon  
35 Cassettes. *Cell Rep* **10**, 1410–1421 (2015).
- 36 28. Lorén, C. E. *et al.* A crucial role for the Anaplastic lymphoma kinase receptor tyrosine kinase  
37 in gut development in *Drosophila melanogaster*. *EMBO Rep.* **4**, 781–786 (2003).
- 38 29. Ou, Y., Chwalla, B., Landgraf, M. & van Meyel, D. J. Identification of genes influencing  
39 dendrite morphogenesis in developing peripheral sensory and central motor neurons. *Neural*  
40 *development* **3**, 16 (2008).
- 41 30. Rohrbough, J. & Broadie, K. Anterograde Jelly belly ligand to Alk receptor signaling at  
42 developing synapses is regulated by Mind the gap. *Development* **137**, 3523–3533 (2010).
- 43 31. Huang, J., Ghosh, P., Hatfull, G. F. & Hong, Y. Successive and Targeted DNA Integrations in the  
44 *Drosophila* Genome by Bxb1 and C31 Integrases. *Genetics* **189**, 391–395 (2011).
- 45 32. Fisher, Y. E. *et al.* FlpStop, a tool for conditional gene control in *Drosophila*. *Elife* **6**, e22279  
46 (2017).
- 47 33. Banovic, D. *et al.* *Drosophila* neuroligin 1 promotes growth and postsynaptic differentiation at  
48 glutamatergic neuromuscular junctions. *Neuron* **66**, 724–738 (2010).
- 49 34. Li, J., Erisir, A. & Cline, H. In vivo time-lapse imaging and serial section electron microscopy  
50 reveal developmental synaptic rearrangements. *Neuron* **69**, 273–286 (2011).



- 1 35. Füger, P., Behrends, L. B., Mertel, S., Sigrist, S. J. & Rasse, T. M. Live imaging of synapse  
2 development and measuring protein dynamics using two-color fluorescence recovery after  
3 photo-bleaching at Drosophila synapses. *Nat Protoc* **2**, 3285–3298 (2007).
- 4 36. Özel, M. N., Langen, M., Hassan, B. A. & Hiesinger, P. R. Filopodial dynamics and growth cone  
5 stabilization in Drosophila visual circuit development. *Elife* **4**, e10721 (2015).
- 6 37. Hussain, A. *et al.* Inhibition of oxidative stress in cholinergic projection neurons fully rescues  
7 aging-associated olfactory circuit degeneration in Drosophila. *Elife* **7**, e32018 (2018).
- 8 38. Andlauer, T. F. M. *et al.* Drep-2 is a novel synaptic protein important for learning and  
9 memory. *Elife* **3**, (2014).
- 10 39. Chen, F., Tillberg, P. W. & Boyden, E. S. Optical imaging. Expansion microscopy. *Science* **347**,  
11 543–548 (2015).
- 12 40. Chozinski, T. J. *et al.* Expansion microscopy with conventional antibodies and fluorescent  
13 proteins. *Nat Methods* **13**, 485–488 (2016).
- 14 41. Nagarkar-Jaiswal, S. *et al.* A library of MiMICs allows tagging of genes and reversible, spatial  
15 and temporal knockdown of proteins in Drosophila. *Elife* **4**, e05338 (2015).
- 16 42. Venken, K. J. T. *et al.* MiMIC: a highly versatile transposon insertion resource for engineering  
17 Drosophila melanogaster genes. *Nat Methods* **8**, 737–743 (2011).
- 18 43. Liu, K. S. Y. *et al.* RIM-binding protein, a central part of the active zone, is essential for  
19 neurotransmitter release. *Science* **334**, 1565–1569 (2011).
- 20 44. Schneider-Mizell, C. M. *et al.* Quantitative neuroanatomy for connectomics in Drosophila.  
21 *Elife* **5**, 1133 (2016).
- 22 45. Meinertzhagen, I. A. & O'Neil, S. D. Synaptic organization of columnar elements in the lamina  
23 of the wild type in Drosophila melanogaster. *J Comp Neurol* **305**, 232–263 (1991).
- 24 46. Rybak, J. *et al.* Synaptic circuitry of identified neurons in the antennal lobe of Drosophila  
25 melanogaster. *J Comp Neurol* **524**, 1920–1956 (2016).
- 26 47. Kwon, H.-B. *et al.* Neuroligin-1–dependent competition regulates cortical synaptogenesis and  
27 synapse number. *Nat Neurosci* **15**, 1667–1674 (2012).
- 28 48. Giachello, C. N. G. & Baines, R. A. Inappropriate Neural Activity during a Sensitive Period in  
29 Embryogenesis Results in Persistent Seizure-like Behavior. *Current Biology* (2015).  
30 doi:10.1016/j.cub.2015.09.040
- 31 49. Rees, C. L., Moradi, K. & Ascoli, G. A. Weighing the Evidence in Peters' Rule: Does Neuronal  
32 Morphology Predict Connectivity? *Trends Neurosci* **40**, 63–71 (2017).
- 33 50. Cline, H. & Haas, K. The regulation of dendritic arbor development and plasticity by  
34 glutamatergic synaptic input: a review of the synaptotrophic hypothesis. **586**, 1509–1517  
35 (2008).
- 36 51. Tripodi, M., Evers, J. F., Mauss, A., Bate, M. & Landgraf, M. Structural homeostasis:  
37 compensatory adjustments of dendritic arbor geometry in response to variations of synaptic  
38 input. *PLoS Biol* **6**, e260 (2008).
- 39 52. Vaughn, J. E. Fine structure of synaptogenesis in the vertebrate central nervous system.  
40 *Synapse* **3**, 255–285 (1989).
- 41 53. Crisp, S. J., Evers, J. F. & Bate, M. Endogenous Patterns of Activity Are Required for the  
42 Maturation of a Motor Network. *Journal of Neuroscience* **31**, 10445–10450 (2011).
- 43 54. Takesian, A. E. & Hensch, T. K. Balancing plasticity/stability across brain development. *Prog.*  
44 *Brain Res.* **207**, 3–34 (2013).
- 45 55. Marguet, S. L. *et al.* Treatment during a vulnerable developmental period rescues a genetic  
46 epilepsy. *Nat Med* **21**, 1436–1444 (2015).
- 47 56. Almeida-Carvalho, M. J. *et al.* The Ol1mpiad: concordance of behavioural faculties of stage 1  
48 and stage 3 Drosophila larvae. *J Exp Biol* **220**, 2452–2475 (2017).
- 49 57. Zhou, X. *et al.* Circuit Design Features of a Stable Two-Cell System. *Cell* **172**, 744–757.e17  
50 (2018).

- 1 58. Evers, J. F., Muench, D. & Duch, C. Developmental relocation of presynaptic terminals along  
2 distinct types of dendritic filopodia. **297**, 214–227 (2006).
- 3 59. Constance, W. D. *et al.* Neurexin and Neuroligin-based adhesion complexes drive axonal  
4 arborisation growth independent of synaptic activity. *Elife* **7**, e31659 (2018).
- 5 60. Spillane, M. *et al.* Nerve Growth Factor-Induced Formation of Axonal Filopodia and Collateral  
6 Branches Involves the Intra-Axonal Synthesis of Regulators of the Actin-Nucleating Arp2/3  
7 Complex. *Journal of Neuroscience* **32**, 17671–17689 (2012).
- 8 61. Menna, E. *et al.* Eps8 Regulates Axonal Filopodia in Hippocampal Neurons in Response to  
9 Brain-Derived Neurotrophic Factor (BDNF). *PLoS Biol* **7**, e1000138 (2009).
- 10 62. Koch, C. & Segev, I. The role of single neurons in information processing. *Nat Neurosci* **3**  
11 **Suppl**, 1171–1177 (2000).
- 12 63. London, M. & Häusser, M. Dendritic computation. *Annu Rev Neurosci* **28**, 503–532 (2005).
- 13 64. Otopalik, A. G., Pipkin, J. & Marder, E. Neuronal morphologies built for reliable physiology in a  
14 rhythmic motor circuit. *Elife* **8**, 9151 (2019).
- 15 65. Otopalik, A. G. *et al.* Sloppy morphological tuning in identified neurons of the crustacean  
16 stomatogastric ganglion. *Elife* **6**, (2017).
- 17 66. Otopalik, A. G., Sutton, A. C., Banghart, M. R. & Marder, E. When complex neuronal  
18 structures may not matter. *Elife* **6**, e23508 (2017).
- 19 67. Ryglewski, S. *et al.* Dendrites are dispensable for basic motoneuron function but essential for  
20 fine tuning of behavior. *Proc Natl Acad Sci USA* (2014). doi:10.1073/pnas.1416247111  
21

# 1 Online Methods

## 2 KEY RESOURCE TABLE

| REAGENT or RESOURCE                                  | SOURCE                                      | IDENTIFIER                    |
|------------------------------------------------------|---------------------------------------------|-------------------------------|
| <b>Antibodies</b>                                    |                                             |                               |
| Rabbit anti-Drep2                                    | Gift from S. Sigrist                        | RRID:AB_2566884               |
| Rabbit anti-RFP                                      | Clontech                                    | 632496                        |
| Rat anti-GFP                                         | Nacalai Tesque                              | 04404-26                      |
| Mouse anti-Brp (nc82)                                | Developmental Studies Hybridoma Bank (DSHB) | RRID:AB_2314866               |
| Guinea pig anti-Jeb                                  | Gift from R. Palmer                         | RRID:AB_2570091               |
| Donkey anti-rat, Alexa Flour 488                     | Jackson ImmunoResearch                      | 712-546-153                   |
| goat anti-rabbit, Atto 647N                          | Sigma-Aldrich                               | 40839                         |
| goat anti-rabbit, Alexa Flour 568                    | Molecular Probes                            | A11011                        |
| goat anti-mouse, Alexa Flour 568                     | Molecular Probes                            | A11004                        |
| goat anti-mouse, Atto 647N                           | Sigma-Aldrich                               | 50185-1ML-F                   |
| DAPI                                                 | Sigma-Aldrich                               | 32670-5MG-F                   |
| Mouse anti-REPO                                      | DSHB                                        | 8D12                          |
| <b>Bacterial and Virus Strains</b>                   |                                             |                               |
| E. coli DH5alpha                                     |                                             |                               |
| <b>Chemicals, Peptides, and Recombinant Proteins</b> |                                             |                               |
| Ammonium persulfate                                  | Sigma-Aldrich                               | A3678                         |
| N,N,N',N'-Tetramethylethylenediamine                 | Roth                                        | 2367.3                        |
| 4-Hydroxy-TEMPO                                      | Sigma-Aldrich                               | 17614-1G                      |
| Sodium Chloride                                      | AppliChem                                   | A3597;<br>CAS: 7647-14-5      |
| Sodium Acrylate                                      | Sigma-Aldrich                               | 408220;<br>CAS: 7446-81-3     |
| Acrylamide                                           | Sigma-Aldrich                               | A4058;<br>CAS: 79-06-1        |
| N,N'-Methylenebisacrylamide                          | Sigma-Aldrich                               | M1533;<br>CAS: 110-26-9       |
| EDTA                                                 | AppliChem                                   | A5097;<br>CAS: 60-00-4        |
| Tris-HCl                                             | Carl Roth                                   | 9090.1;<br>CAS: 1185-53-1     |
| Triton X-100                                         | Sigma-Aldrich                               | X100;<br>CAS: 9002-93-1       |
| Guanide HCL                                          | Carl Roth                                   | 0037.3                        |
| Proteinase K                                         | New England Biolabs                         | P8107S                        |
| Methylacrylic acid N-hydroxy succinimide ester       | Sigma-Aldrich                               | 730300-1G;<br>CAS: 38862-25-8 |
| Sodium dihydrogen phosphate hydrate                  | Grüssing                                    | 12298;<br>CAS: 10049-21-5     |
| Disodium hydrogen phosphate dihydrate                | AppliChem                                   | A3567;<br>CAS: 10028-24-7     |

|                                                                                                      |                                            |                                 |
|------------------------------------------------------------------------------------------------------|--------------------------------------------|---------------------------------|
| Poly-L-lysine solution                                                                               | Sigma                                      | A8920-100ml;<br>CAS: 25988-63-0 |
| <b>Experimental Models: Organisms/Strains</b>                                                        |                                            |                                 |
| <i>w; elav-Gal4 / CyO, wgZ</i>                                                                       | Bloomington Drosophila Stock Center (BDSC) | RRID_BDSC_8765                  |
| <i>yw;;nSyb-Gal4 @ attP2</i>                                                                         | BDSC                                       | RRID_BDSC_51941                 |
| <i>Jeb</i> MiMIC = MiMIC 03124<br><i>yw; jeb<sup>MI03124</sup> / SM6a</i>                            | BDSC                                       | RRID_BDSC_36200                 |
| <i>Alk</i> MiMIC = MiMIC 10448<br><i>yw; alk<sup>MI10448</sup></i>                                   | BDSC                                       | RRID_BDSC_54555                 |
| <i>Drep2</i> MiMIC = MiMIC 15483<br><i>yw; Drep2<sup>MI15483</sup> / SM6a</i>                        | BDSC                                       | RRID_BDSC_61067                 |
| <i>Brp</i> MiMIC = MiMIC 02987<br><i>yw; brp<sup>MI02987</sup>/SM6a</i>                              | BDSC                                       | RRID_BDSC_37043                 |
| <i>w;; eyg-GAL4 / TM6b, Hu, Tb</i>                                                                   | BDSC                                       | RRID_BDSC_25574                 |
| <i>w; UAS-Flp / CyO</i>                                                                              | BDSC                                       | RRID_BDSC_8212                  |
| <i>w;; repo-Gal4 / TM6b, Hu, Tb</i>                                                                  | BDSC                                       | RRID_BDSC_64349                 |
| <i>Jeb</i> deficiency Df( <i>jeb</i> ):<br><i>Df(2R)BSC40 / SM6a</i>                                 | BDSC                                       | RRID_BDSC_7146                  |
| <i>jeb<sup>2</sup></i> mutant:<br><i>yw; jeb<sup>SH0442</sup> / CyO, wgZ</i>                         | (Oh et al., 2003)                          | FBal0144029                     |
| <i>yw;;mef2-GAL4</i>                                                                                 | BDSC                                       | RRID_BDSC_27390                 |
| Oregon R                                                                                             | BDSC                                       | RRID_BDSC_5                     |
| <i>UAS-Alk<sup>DN</sup></i> :<br><i>w; UAS-Alk<sup>EC.UAS.Tag:MYC</sup> / CyO, wgZ;</i>              | (Bazigou et al., 2007)                     | FBal0194692                     |
| <i>UAS-Drep2::GFP</i>                                                                                | (Andlauer et al., 2014)                    | FBtp0097167                     |
| <i>w;UAS-Brp<sup>Short</sup>::Strawberry / CyO, wgZ</i>                                              | (Fouquet et al, 2009)                      | FBal0265994                     |
| <i>w;UAS-Brp::RFP</i>                                                                                | (Wagh et al., 2006)                        |                                 |
| <i>w;UAS-dSyd1::GFP</i>                                                                              | (Owald et al., 2010)                       | FBtp0022731                     |
| <i>w;;10xUAS-IVS-myr::mtdTomato2 @ attP2 / TM6b, Hu, Tb</i>                                          | (Pfeiffer et al., 2010)                    | RRID_BDSC_32221                 |
| <i>w;;UAS-bxb1 @ VK00027 / TM6b, Hu, Tb</i>                                                          | (Sutcliff et al., 2017)                    | RRID_BDSC_67628                 |
| <i>w; UAS-Jeb</i>                                                                                    | (Varshney and Palmer, 2006)                | FBal0194694                     |
| <i>w;; UAS-Alk<sup>FL</sup></i>                                                                      | (Loren et al., 2001)                       | FBal0125507                     |
| <i>Jeb-T2A-Gal4</i><br><i>w; Jeb<sup>MI03124-TG4.1</sup> / CyO</i>                                   | (Diao et al., 2011)                        | FBal0304213                     |
| <i>ChaT-T2A-Gal4</i><br><i>w; ChaT<sup>MI04508-TG4.0</sup> / TM6B, Tb</i>                            | (Diao et al., 2011)                        | RRID_BDSC_60317                 |
| <i>Gad1-T2A-Gal4</i><br><i>w; Gad1<sup>MI09277-TG4.2</sup> / TM6B, Tb</i>                            | (Diao et al., 2011)                        | FBal0304224                     |
| <i>w; jeb<sup>2</sup> ; BF29<sup>VP16.AD</sup>, Cha(7.4kb)<sup>Gal4.DBD J8A1</sup>, UAS-Brp::RFP</i> | (Couton et al., 2015)                      |                                 |
| <i>w;;10xUAS-IVS-myr::mTurquoise2 / TM6b, Hu, Tb</i>                                                 | This paper                                 |                                 |
| <i>w;;LexAOp-myr::YPet @ attP2 / TM6b, Hu, Tb, dfd-GMR-nvYFP</i>                                     | This paper                                 |                                 |
| <i>yw; jeb<sup>BOnStop</sup> / CyO, dfd-GMR-nvYFP</i>                                                | This paper                                 |                                 |
| <i>yw; brp<sup>FOnYPet</sup> / CyO, dfd-GMR-nvYFP</i>                                                | This paper                                 |                                 |
| <i>yw; brp<sup>FOnmRuby</sup> / CyO, dfd-GMR-nvYFP</i>                                               | This paper                                 |                                 |
| <i>yw; Drep2<sup>FOnYPet</sup> / CyO, dfd-GMR-nvYFP</i>                                              | This paper                                 |                                 |

|                                                                                                                                                                                           |            |  |
|-------------------------------------------------------------------------------------------------------------------------------------------------------------------------------------------|------------|--|
| <i>yw; AIk<sup>FOnYPet</sup> / CyO, dfd-GMR-nvYFP</i>                                                                                                                                     | This paper |  |
| <i>yw; AIk<sup>YPet</sup> / CyO, dfd-GMR-nvYFP</i>                                                                                                                                        | This paper |  |
| <i>w;;nSyb-bxb1 @ VK00027</i>                                                                                                                                                             | This paper |  |
| <i>RN2-FLP<sub>C</sub>, tub84B-FRT-CD2.STOP-FRT-GAL4, UAS-myr::mtdTomato2 / TM6b, Hu, Tb, dfd-GMR-nvYFP</i>                                                                               | This paper |  |
| <i>RN2-FLP<sub>A</sub>, tub84B-FRT-STOP-FRT-LexA.VP16, 13xLexAOp-IVS-myr::YPet @ attP2</i>                                                                                                | This paper |  |
| <i>w ; Df(jeb), UAS-Jeb</i>                                                                                                                                                               | This paper |  |
| <i>w; UAS-Flp / CyO, dfd-GMR-nvYFP; eyg-Gal4, 10xUAS-IVS-myr::mtdTomato2 @ attP2/ / TM6b, Hu, Tb, Sb, dfd-GMR-nvYFP</i>                                                                   | This paper |  |
| <i>w; jeb<sup>2</sup>, UAS-Brp<sup>short</sup>::Strawberry / CyO, dfd-GMR-nvYFP; eyg-Gal4, 10xUAS-IVS-myr::mTurquoise2 @ attP2/ TM6b, Hu, Tb, Sb, dfd-GMR-nvYFP</i>                       | This paper |  |
| <i>w; jeb<sup>2</sup>, UAS-Brp<sup>short</sup>::Strawberry / CyO, dfd-GMR-nvYFP; eyg-Gal4, 10xUAS-IVS-myr::mTurquoise2 @ attP2, UAS-Bxb1 @ VK00027 / TM6b, Hu, Tb, Sb, dfd-GMR-nvYFP</i>  | This paper |  |
| <i>w; jeb<sup>BOnStop</sup> / CyO, dfd-GMR-nvYFP; RN2-Flp, tub84B-FRT-STOP-FRT- LexA.VP16, 13xLexAOp2-IVS-myr::YPet @ attP2/ TM6b, Hu, Tb, Sb, dfd-GMR-nvYFP</i>                          | This paper |  |
| <i>w; jeb<sup>2</sup>, UAS-Brp<sup>short</sup>::Strawberry / CyO, dfd-GMR-nvYFP; eyg-Gal4, 10xUAS-IVS-myr::mTurquoise2 @ attP2, nSyb-Bxb1 @ VK00027 / TM6b, Hu, Tb, Sb, dfd-GMR-nvYFP</i> | This paper |  |
| <i>w; UAS-Brp<sup>short</sup>::Strawberry / CyO, dfd-GMR-nvYFP; eyg-Gal4, 10xUAS-IVS-myr::mTurquoise2 @ attP2, UAS-Bxb1 @ VK00027/ TM6b, Hu, Tb, Sb, dfd-GMR-nvYFP</i>                    | This paper |  |
| <i>w; jeb<sup>2</sup>, UAS-Brp<sup>short</sup>::Strawberry / CyO, dfd-GMR-nvYFP; eyg-Gal4, 10xUAS-IVS-myr::mTurquoise2 @ attP2/ TM6b, Hu, Tb, Sb, dfd-GMR-nvYFP</i>                       | This paper |  |
| <i>w; jeb<sup>2</sup> / CyO, dfd-GMR-nvYFP; eyg-Gal4, 10xUAS-IVS-myr::mtdTomato2 @ attP2/ TM6b, Hu, Tb, Sb, dfd-GMR-nvYFP</i>                                                             | This paper |  |
| <i>w; jeb<sup>2</sup> / CyO, dfd-GMR-nvYFP; eyg-Gal4, 10xUAS-IVS-myr::mtdTomato2 @ attP2, UAS-Bxb1@ VK00027 / TM6b, Hu, Tb, Sb, dfd-GMR-nvYFP</i>                                         | This paper |  |

|                                                                                                                                                                                      |                                                 |                    |
|--------------------------------------------------------------------------------------------------------------------------------------------------------------------------------------|-------------------------------------------------|--------------------|
| <i>w; Drep2<sup>FOnYPet</sup> / CyO, dfd-GMR-nvYFP; RN2-Flp, tub84B-FRT-CD2.STOP-FRT-GAL4, 10xUAS-IVS-myr::mtdTomato2 @ attP2 / TM6b, Hu, Tb, Sb, dfd-GMR-nvYFP</i>                  | This paper                                      |                    |
| <i>w; jeb<sup>2</sup>, Drep2<sup>FOnYPet</sup> / CyO, dfd-GMR-nvYFP; RN2-Flp, tub84B-FRT-CD2.STOP-FRT-GAL4, 10xUAS-IVS-myr::mtdTomato2 @ attP2 / TM6b, Hu, Tb, Sb, dfd-GMR-nvYFP</i> | This paper                                      |                    |
| <i>w; jeb<sup>BOnStop</sup> / CyO, dfd-GMR-nvYFP; nSyb-Bxb1 @ VK00027 / TM6b, Hu, Tb, Sb, dfd-GMR-nvYFP</i>                                                                          | This paper                                      |                    |
| <i>w; UAS-Alk<sup>DN</sup>; RN2-Flp<sub>A</sub>, tub84B-FRT-STOP-FRT-LexVP16, 13xLexAOp2-IVS-myr::YPet @ attP2 / TM6b, Hu, Tb, Sb, dfd-GMR-nvYFP</i>                                 | This paper                                      |                    |
| <i>w; UAS-Alk<sup>DN</sup>; RN2-Flp<sub>C</sub>, tub84B-FRT-CD2.STOP-FRT-GAL4, 10xUAS-IVS-myr::mtdTomato2 @ attP2 / TM6b, Hu, Tb, Sb, dfd-GMR-nvYFP</i>                              | This paper                                      |                    |
| <i>w; jeb<sup>2</sup> / CyO, dfd-GMR-nvYFP; RN2-Flp<sub>C</sub>, tub84B-FRT-CD2.STOP-FRT-GAL4, 10xUAS-IVS-myr::mtdTomato2 @ attP2 / TM6b, Hu, Tb, Sb, dfd-GMR-nvYFP</i>              | This paper                                      |                    |
| <i>w; jeb<sup>BOnStop</sup> / CyO, dfd-GMR-nvYFP; UAS-Bxb1 @ VK00027 / TM6b, Hu, Tb, Sb, dfd-GMR-nvYFP</i>                                                                           | This paper                                      |                    |
| <i>w; UAS-Flp / CyO, dfd-GMR-nvYFP; nSyb-GAL4 @ attP2</i>                                                                                                                            | This paper                                      |                    |
| <i>w; Alk<sup>FOnYPet</sup> / CyO, dfd-GMR-nvYFP; repo-GAL4 / TM6b, Hu, Tb, Sb, dfd-GMR-nvYFP</i>                                                                                    | This paper                                      |                    |
| <i>w; jeb<sup>BOnStop</sup> / CyO, dfd-GMR-nvYFP; mef2-Gal4 / TM6b, Hu, Tb, Sb, dfd-GMR-nvYFP</i>                                                                                    | This paper                                      |                    |
| <i>w; jeb<sup>2</sup> / CyO, dfd-GMR-nvYFP; UAS-Bxb1 @ VK00027 / TM6b, Hu, Tb, Sb, dfd-GMR-nvYFP</i>                                                                                 | This paper                                      |                    |
| <i>w; UAS-Flp, Brp<sup>FOnmRuby2</sup> / CyO, dfd-GMR-nvYFP; eyg-Gal4, 10xUAS-IVS-myr::mTurquoise2 @ attP2 / TM6b, Hu, Tb, Sb, dfd-GMR-nvYFP</i>                                     | This paper                                      |                    |
| <i>w; UAS-Flp, Brp<sup>FOnYPet</sup> / CyO, dfd-GMR-nvYFP;</i>                                                                                                                       | This paper                                      |                    |
| <i>w; UAS-Flp, Brp<sup>FOnmRuby2</sup> / CyO, dfd-GMR-nvYFP;</i>                                                                                                                     | This paper                                      |                    |
| <b>Recombinant DNA</b>                                                                                                                                                               |                                                 |                    |
| pBluescript                                                                                                                                                                          |                                                 |                    |
| pJFRC18-8XLexAop2-mCD8::GFP                                                                                                                                                          | gift from Gerald Rubin (Pfeiffer et al., 2010)  | RRID:Addgene_26225 |
| pJFRC19-13XLexAop2-IVS-myr::GFP                                                                                                                                                      | gift from Gerald Rubin (Pfeiffer et al., 2010)  | RRID:Addgene_26224 |
| pJFRC12-10XUAS-IVS-myr::GFP                                                                                                                                                          | gift from Gerald Rubin (Pfeiffer et al., 2010)  | RRID:Addgene_26222 |
| pLifeAct-mTurquoise2                                                                                                                                                                 | gift from Dorus Gadella (Goedhart et al., 2012) | RRID:Addgene_36201 |
| HeatShock-Hsp70Bb_Bxb1_Hsp70BbUTR                                                                                                                                                    | gift from Gregory Jefferis                      | RRID:Addgene_87642 |
| pcDNA3-mRuby2                                                                                                                                                                        | gift from Michael Lin (Lam et al. 2012)         | RRID:Addgene_40260 |
| pDONR(nORIENT)-attB-BRP-SNAP-UTR-ICRE-floxRFP                                                                                                                                        | gift from Gregory Jefferis (Kohl et al., 2014)  |                    |

|                                     |                                                            |                                                                                    |
|-------------------------------------|------------------------------------------------------------|------------------------------------------------------------------------------------|
| pJFRC19-13XLexAop2-IVS-myr::YPet    | This paper                                                 |                                                                                    |
| pJFRC12-10XUAS-IVS-myr::mTurquoise2 | This paper                                                 |                                                                                    |
| dFLEX <sup>FlpYPet</sup> -F0        | This paper                                                 |                                                                                    |
| dFLEX <sup>FlpYPet</sup> -F1        | This paper                                                 |                                                                                    |
| dFLEX <sup>FlpYPet</sup> -F2        | This paper                                                 |                                                                                    |
| dFLEX <sup>FlpRuby2</sup> -F0       | This paper                                                 |                                                                                    |
| dFLEX <sup>FlpRuby2</sup> -F1       | This paper                                                 |                                                                                    |
| dFLEX <sup>FlpRuby2</sup> -F2       | This paper                                                 |                                                                                    |
| dFLEX-AIk <sup>FOnYPet</sup>        | This paper                                                 |                                                                                    |
| dFLEX-Drep2 <sup>FOnYPet</sup>      | This paper                                                 |                                                                                    |
| dFLEX <sup>BxbStop</sup>            | This paper                                                 |                                                                                    |
| pJFRC-nSyb-Bxb1                     | This paper                                                 |                                                                                    |
| <b>Software and Algorithms</b>      |                                                            |                                                                                    |
| R                                   | R Foundation for Statistical Computing<br>R Core Team 2013 | RRID:SCR_001905; <a href="http://www.r-project.org/">http://www.r-project.org/</a> |
| Amira 6.0                           | FEI                                                        | RRID:SCR_014305                                                                    |
| FIJI                                | <a href="http://fiji.sc">http://fiji.sc</a>                | RRID: SCR_002285                                                                   |
| NIS Elements                        | Nikon                                                      | RRID:SCR_014329                                                                    |
| Amira hxskeletonize plugin          | (Schmitt et al., 2004; Evers et al., 2005)                 |                                                                                    |

1  
2  
3  
4  
5  
6  
7  
8  
9  
10  
11  
12  
13  
14  
15  
16  
17  
18  
19  
20  
21  
22  
23  
24  
25  
26  
27

## EXPERIMENTAL MODEL AND SUBJECT DETAILS

*Drosophila melanogaster* wild-type strain Oregon R (OrR) and mutant flies were raised on standard medium at 25°C and 60% humidity in constant darkness.

## CONTACT FOR REAGENT AND RESOURCE SHARING

Further information and requests for resources and reagents should be directed to and will be fulfilled by the Lead Contact, Jan Felix Evers ([jan-felix.evers@cos.uni-heidelberg.de](mailto:jan-felix.evers@cos.uni-heidelberg.de))

## METHOD DETAILS

### Staging of animals

Flies were allowed to lay eggs on apple juice-based agar medium overnight at 25 °C, or 30 °C for experiments using the RN2-FLP alleles (Ou et al., 2008). To aid collection of trachea-filled embryos, the chorion was removed by incubation with household bleach for 2 minutes. Larvae that hatched within the next hour were collected for data collection (designated 0 h ALH), or allowed to develop further in yeast paste until the desired age.

### Intra-vital imaging

Larvae were removed from food and rinsed with tap water before placing them onto a cover slip in a custom build imaging chamber with the ventral side facing the microscope objective. Animals were anaesthetized with 18% desflurane (Baxter) (Füger et al., 2007), vaporized with a D-Vapor apparatus (Dräger Medical). A piezo motor inside the imaging chamber allowed to gently compress the anesthetized larvae with a second glass cover slip to improve optical contact and thus image quality. Image stacks were acquired in intact, transiently anesthetized first (0h ALH), and second (24 h ALH) instar stage. At third instar (48 h ALH), the larval CNS was dissected in Sørensen buffer and acutely imaged without fixation.

### Immunohistochemistry

1 Embryonic and larval VNCs were dissected in Sørensen's phosphate buffer (pH 7.2, 0.075 M). Samples were mounted  
2 on a poly-L-lysine (Sigma) coated coverslip and fixed for 15 minutes in 2% paraformaldehyde (v/v) (Electron  
3 Microscopy Sciences) and 3% sucrose (w/v) in Sørensen's. After 30 minutes of washing in buffer containing 0.3%  
4 Triton-X-100 (Sigma- Aldrich), primary antibody treatment was performed overnight at 10°C. After a minimum of 30  
5 minutes of washing specimen were incubated with secondary antibodies for 2 hours at room temperature. The  
6 following antibodies were used: Primary: rabbit anti-Drep2 1:500 (S. Sigrist), rabbit anti-RFP 1:500 (Clontech), anti-  
7 GFP 1:1000 (Nacalai Tesque), nc82 1:700 (DSHB), anti-Jeb 1:2000 (R. Palmer). Secondary antibodies: donkey anti-  
8 rat Alexa488 1:500 (Jackson ImmunoResearch), goat anti-rabbit Alexa568 1:1000 (Molecular Probes), goat anti-  
9 rabbit atto647N 1:500 (Sigma-Aldrich), goat anti-mouse Alexa568 1:1000 (Molecular Probes), goat anti-mouse  
10 alexa647N 1:1000 (Sigma-Aldrich).

## 11 12 Expansion microscopy of ventral nerve cord preparations

13 To perform expansion microscopy, samples were immunostained as described above, followed by incubation in 1  
14 mM Methacrylic acid *N*-hydroxysuccinimide ester for 1 hour at RT (Chozinski et al., 2016). To minimize tissue warping  
15 in high saline buffer, samples were incubated in 30% and 60% monomer solution (MS) (1xPBS, 2 M NaCl, 2.5%  
16 (wt/wt) acrylamide, 0.15% (wt/wt) N,N'-methylenebisacrylamide, 8.625% (wt/wt) sodium acrylate) for 15 minutes  
17 each and 100% MS for 45 minutes at 4°C. Gelling was performed at 37 °C for 1h after adding ammonium persulfate  
18 (Sigma-Aldrich), N,N,N',N'-Tetramethylethylenediamine (Roth) and 4-Hydroxy-TEMPO (Sigma-Aldrich) to MS. After  
19 gelling, excess gel was removed and embedded specimen were placed in digestion buffer (1X TAE, 0.5% Triton X-  
20 100, 0.8 M guanidine HCL) with 8 units/ml Proteinase K (NEB) for 2 hours at 37 °C. The gel was expanded in deionized  
21 water for a total of 1h. Water was exchanged every 15 min. Gels were mounted on poly-L-lysine coated cover slips  
22 for imaging.

## 23 24 Image Acquisition

25 All images were acquired with a custom-built spinning disk confocal field scanner mounted on a Nikon Ti microscope,  
26 using a 60x/1.2 N.A. Nikon water immersion objective. Images were acquired with a Photometrics Evolve Delta  
27 camera at an effective voxel size of 0.267 × 0.267 × 0.300 μm. Image acquisition was controlled by MicroManager  
28 (NIH, Arthur et al, 2014) or NIS Elements (Nikon).

## 29 30 Electrophysiology and Electroshock assay

31 Whole-cell patch clamp recordings from RP2 motoneurons were performed at 48 h and 0-3 h ALH and analyzed as  
32 previously described (Baines and Bate, 1998). Electroshock assay was performed as previously described (Marley  
33 and Baines, 2011). A 2.3 V DC pulse for 2 s, created by a constant voltage generator (DS2A-mkII, Digitimer Ltd.,  
34 Welwyn Garden City, Hertfordshire, UK), was applied on the anterior-dorsal cuticle of third instar larvae. The time  
35 to resumption of normal crawling behavior was measured as recovery time (RT).

## 36 37 Cloning

38 All transformation plasmid were made by Gibson Assembly (Gibson et al., 2009). The dFLEX<sup>FlpYPet</sup> linear fragment (Fig  
39 S4) was made by gene synthesis; FRT and FRT<sub>F5</sub> sequences from (Schlake and Bode, 1994) and TN5 linker sequence  
40 from (Matkovic et al., 2013; Sheridan et al., 2002) and YPet sequence from (Nguyen and Daugherty, 2005). Figures  
41 S4-S7 show the primers used to make each plasmid. pJFRC12-10XUAS-IVS-myr::mTurquoise2 was made by  
42 amplifying mTurquoise2 from LifeAct-mTurquoise2 with Gibson compatible overlaps for insertion into pJFRC12-  
43 10XUAS-IVS-myr::GFP, directly replacing GFP. pJFRC19-13XLexAop2-IVS-myr::YPet was generated by subcloning  
44 YPet from dFLEX<sup>FlpYPet</sup>-F0 into pJFRC19-13XLexAop2-IVS-myr::GFP, directly replacing GFP.

## 45 46 Transgenic animals

47 Transgenic flies were made at University of Cambridge, Department of Genetics Fly Facility. Flies carrying *brp*<sup>FOnYPet</sup>  
48 and *brp*<sup>FOnmRuby2</sup> were generated by insertion of dFLEX<sup>FlpYPet</sup>-F0 and dFLEX<sup>FlpmRuby2</sup>-F0 respectively into Brp<sup>MI02987</sup>,  
49 located in a coding intro between exon 9 and 10. Drep2<sup>FOnYPet</sup> flies were made by insertion of dFLEX-Drep2<sup>FOnYPet</sup> into  
50 Drep2<sup>MI15483</sup> followed by induced homologous recombination by I-Cre1 expression in the germ line. The induced  
51 Drep2<sup>FOnYPet</sup> allele labels Drep2 at the N-Term. Alk<sup>FOnYPet</sup> flies resulted from insertion of dFLEX-Alk<sup>FOnYPet</sup> into Alk<sup>MI10448</sup>



1 followed by I-Crel induced homologous recombination in the germ line. Induced Alk<sup>FOnYPet</sup> labels Alk at the C-Term.  
2 The *jeb*<sup>BOnStop</sup> allele resulted from dFLEX-*Jeb*<sup>BOnStop</sup> insertion into *Jeb*<sup>M103124</sup>, immediately preceding the region coding  
3 for the type A LDL receptor domain. pJFRC18-nSyb-Bxb1 was inserted into VK00027 to generate *nSyb-Bxb1* flies.  
4 pJFRC19-13XLexAop2-IVS-myr::YPet and pJFRC12-10XUAS-IVS-myr::mTurquoise2 were injected into attP2.  
5

## 1 QUANTIFICATION AND STATISTICAL ANALYSIS

### 3 Analysis of neuronal morphology

4 The branched morphology of neurons was quantified by digital 3D reconstruction using the hxskeletonize plugin  
5 (Evers et al., 2005; Schmitt et al., 2004) with Amira 6.0 (FEI). Dendritic and axonal growth dynamics were annotated  
6 manually by comparing 3D reconstructions from adjacent time points of intra-vital imaging sequences. Identification  
7 of branches was started from the primary neurite following the largest branches until finally comparing thin, terminal  
8 structures. Following criteria were evaluated: (1) position of the branch origin (branchpoint) along the parent branch;  
9 (2) position of the branch insertion relative to other branches along the parent branch; (3) insertion and growth  
10 direction of branch relative to the parent branch, primary neurite, and cell body; (4) shape of the branch  
11 (curvature/bend); (5) length of the branch.

12 The recording angle differed between subsequent intra-vital imaging time points of the same neuron. Limited by  
13 the optical resolution of spinning disk confocal microscopy, we found that insertion angles of obviously identical  
14 branches into their parent branches vary by up to 90 degrees between time points. Therefore, changes of insertion  
15 angle up to 90 degrees were considered a modification of an existing branch; variations larger than 90 degrees were  
16 indicative for a newly formed branch. We found neuronal branches that were embryonically established and  
17 maintained until 48 h ALH to scale by a factor of 1.3 from 0-24 h ALH, and 1.4 from 24-48 h ALH. We applied the  
18 according scale factor to help distinguish scaling growth from tip growth: sections of individual branches that grew  
19 longer than what could be assumed by scaling growth were classified as new length.

20 Data was exported as csv and processed using customized R scripts.

### 22 Quantification of synaptic contacts

23 Image stacks of RP2 motoneurons were recorded with expansion microscopy, and processed in FIJI by applying a  
24 Gaussian 3D filter, and subtracting background noise using the rolling ball algorithm. Drep2 puncta were manually  
25 counted as mature synapses if found to juxtapose Brp (anti-Brp), using the FIJI Cell Counter plugin  
26 (<http://rsbweb.nih.gov/ij/plugins/cell-counter.html>). Profiles of fluorescence intensity across synaptic contact were  
27 determined along a straight line connecting Drep2 and Brp signals, and averaged between multiple samples.  
28 Distances were measured according to microscope magnification, and corrected by the experimentally determined  
29 expansion factor of 3.7.

### 31 Statistical Analysis

32 All statistical comparisons were made using pairwise Student's t test for multiple comparison of parametric data  
33 followed by p-adjustment after Holm, unless otherwise noted. Statistical tests were performed using R (R-project).  
34 Data are reported as mean  $\pm$  standard error of mean (SEM). Dots represent single data points. Plots were generated  
35 with ggplot2 (NB: <https://cran.r-project.org/web/packages/ggplot2/citation.html>)

## 37 DATA AND SOFTWARE AVAILABILITY

38 All data published in this study are available upon request ([jan-felix.evers@cos.uni-heidelberg.de](mailto:jan-felix.evers@cos.uni-heidelberg.de)).

## 40 Method References

41 Andlauer, T.F.M., Scholz-Kornehl, S., Tian, R., Kirchner, M., Babikir, H.A., Depner, H., Loll, B., Quentin, C., Gupta,  
42 V.K., Holt, M.G., et al. (2014). Drep-2 is a novel synaptic protein important for learning and memory. *Elife* 3.

43 Bazigou, E., Apitz, H., Johansson, J., Lorén, C.E., Hirst, E.M.A., Chen, P.-L., Palmer, R.H., and Salecker, I. (2007).  
44 Anterograde Jelly belly and Alk Receptor Tyrosine Kinase Signaling Mediates Retinal Axon Targeting in *Drosophila*.  
45 *Cell* 128, 961–975.

46 Baines, R.A., and Bate, M. (1998). Electrophysiological development of central neurons in the *Drosophila* embryo.  
47 *18*, 4673–4683.

- 1 Chozinski, T.J., Halpern, A.R., Okawa, H., Kim, H.-J., Tremel, G.J., Wong, R.O.L., and Vaughan, J.C. (2016). Expansion  
2 microscopy with conventional antibodies and fluorescent proteins. *Nat Methods* 13, 485–488.
- 3 Couton, L., Mauss, A.S., Yunusov, T., Diegelmann, S., Evers, J.F., and Landgraf, M. (2015). Development of  
4 connectivity in a motoneuronal network in *Drosophila* larvae. *Curr Biol* 25, 568–576.
- 5 Diao, F., and White, B.H. (2011). A Novel Approach for Directing Transgene Expression in *Drosophila*: T2A-Gal4 In-  
6 Frame Fusion. *Genetics*.
- 7 Evers, J.F., Schmitt, S., Sibila, M., and Duch, C. (2005). Progress in functional neuroanatomy: precise automatic  
8 geometric reconstruction of neuronal morphology from confocal image stacks. *J Neurophysiol* 93, 2331–2342.
- 9 Fouquet, W., Oswald, D., Wichmann, C., Mertel, S., Depner, H., Dyba, M., Hallermann, S., Kittel, R.J., Eimer, S., and  
10 Sigrist, S.J. (2009). Maturation of active zone assembly by *Drosophila* Bruchpilot. *J Cell Biol* 186, 129–145.
- 11 Füger, P., Behrends, L.B., Mertel, S., Sigrist, S.J., and Rasse, T.M. (2007). Live imaging of synapse development and  
12 measuring protein dynamics using two-color fluorescence recovery after photo-bleaching at *Drosophila* synapses.  
13 *Nat Protoc* 2, 3285–3298.
- 14 Gibson, D.G., Young, L., Chuang, R.-Y., Venter, J.C., Hutchison, C.A., and Smith, H.O. (2009). Enzymatic assembly of  
15 DNA molecules up to several hundred kilobases. *Nat Methods* 6, 343–345.
- 16 Goedhart, J., Stetten, von, D., Noirclerc-Savoie, M., Lelimosin, M., Joosen, L., Hink, M.A., van Weeren, L., Gadella,  
17 T.W.J., Jr, and Royant, A. (2012). Structure-guided evolution of cyan fluorescent proteins towards a quantum yield  
18 of 93%. *Nat Comms* 3, 751.
- 19 Kohl, J., Ng, J., Cachero, S., Ciabatti, E., Dolan, M.-J., Ben Sutcliffe, Tozer, A., Ruehle, S., Krueger, D., Frechter, S., et  
20 al. (2014). Ultrafast tissue staining with chemical tags. *Proc Natl Acad Sci USA* 111, E3805–E3814.
- 21 Lam, A.J., St-Pierre, F., Gong, Y., Marshall, J.D., Cranfill, P.J., Baird, M.A., McKeown, M.R., Wiedenmann, J.,  
22 Davidson, M.W., Schnitzer, M.J., et al. (2012). Improving FRET dynamic range with bright green and red fluorescent  
23 proteins. *Nat Methods* 9, 1005–1012.
- 24 Lorén, C.E., Scully, A., Grabbe, C., Edeen, P.T., Thomas, J., McKeown, M., Hunter, T., and Palmer, R.H. (2001).  
25 Identification and characterization of DALK: a novel *Drosophila melanogaster* RTK which drives ERK activation in  
26 vivo. *Genes Cells* 6, 531–544.
- 27 Marley, R., and Baines, R.A. (2011). Increased persistent Na<sup>+</sup> current contributes to seizure in the slamdance bang-  
28 sensitive *Drosophila* mutant. *J Neurophysiol* 106, 18–29.
- 29 Matkovic, T., Siebert, M., Knoche, E., Depner, H., Mertel, S., Oswald, D., Schmidt, M., Thomas, U., Sickmann, A.,  
30 Kamin, D., et al. (2013). The Bruchpilot cytomatrix determines the size of the readily releasable pool of synaptic  
31 vesicles. *J Cell Biol* 202, 667–683.
- 32 Nguyen, A.W., and Daugherty, P.S. (2005). Evolutionary optimization of fluorescent proteins for intracellular FRET.  
33 *Nat Biotechnol* 23, 355–360.
- 34 Ou, Y., Chwalla, B., Landgraf, M., and van Meyel, D.J. (2008). Identification of genes influencing dendrite  
35 morphogenesis in developing peripheral sensory and central motor neurons. *Neural Development* 3, 16.
- 36 Oswald, D., Fouquet, W., Schmidt, M., Wichmann, C., Mertel, S., Depner, H., Christiansen, F., Zube, C., Quentin, C.,  
37 Körner, J., et al. (2010). A Syd-1 homologue regulates pre- and postsynaptic maturation in *Drosophila*. *J Cell Biol*  
38 188, 565–579.

- 1 Pfeiffer, B.D., Ngo, T.-T.B., Hibbard, K.L., Murphy, C., Jenett, A., Truman, J.W., and Rubin, G.M. (2010). Refinement  
2 of Tools for Targeted Gene Expression in *Drosophila*. *Genetics*.
- 3 Schlake, T., and Bode, J. (1994). Use of mutated FLP recognition target (FRT) sites for the exchange of expression  
4 cassettes at defined chromosomal loci. *Biochemistry* 33, 12746–12751.
- 5 Schmitt, S., Evers, J.F., Duch, C., Scholz, M., and Obermayer, K. (2004). New methods for the computer-assisted 3-D  
6 reconstruction of neurons from confocal image stacks. *Neuroimage* 23, 1283–1298.
- 7 Sheridan, D.L., Berlot, C.H., Robert, A., Inglis, F.M., Jakobsdottir, K.B., Howe, J.R., and Hughes, T.E. (2002). A new  
8 way to rapidly create functional, fluorescent fusion proteins: random insertion of GFP with an in vitro transposition  
9 reaction. *BMC Neurosci* 3, 7.
- 10 Sutcliffe, B., Ng, J., Auer, T.O., Pasche, M., Benton, R., Jefferis, G.S.X.E., and Cachero, S. (2017). Second-Generation  
11 *Drosophila* Chemical Tags: Sensitivity, Versatility, and Speed. *Genetics* 205, 1399–1408.
- 12 Varshney, G.K., and Palmer, R.H. (2006). The bHLH transcription factor Hand is regulated by Alk in the *Drosophila*  
13 embryonic gut. *Biochem Biophys Res Commun* 351, 839–846.
- 14 Wagh, D.A., Rasse, T.M., Asan, E., Hofbauer, A., Schwenkert, I., Dürbeck, H., Buchner, S., Dabauvalle, M.-C.,  
15 Schmidt, M., Qin, G., et al. (2006). Bruchpilot, a protein with homology to ELKS/CAST, is required for structural  
16 integrity and function of synaptic active zones in *Drosophila*. *Neuron* 49, 833–844.

## Figure 1

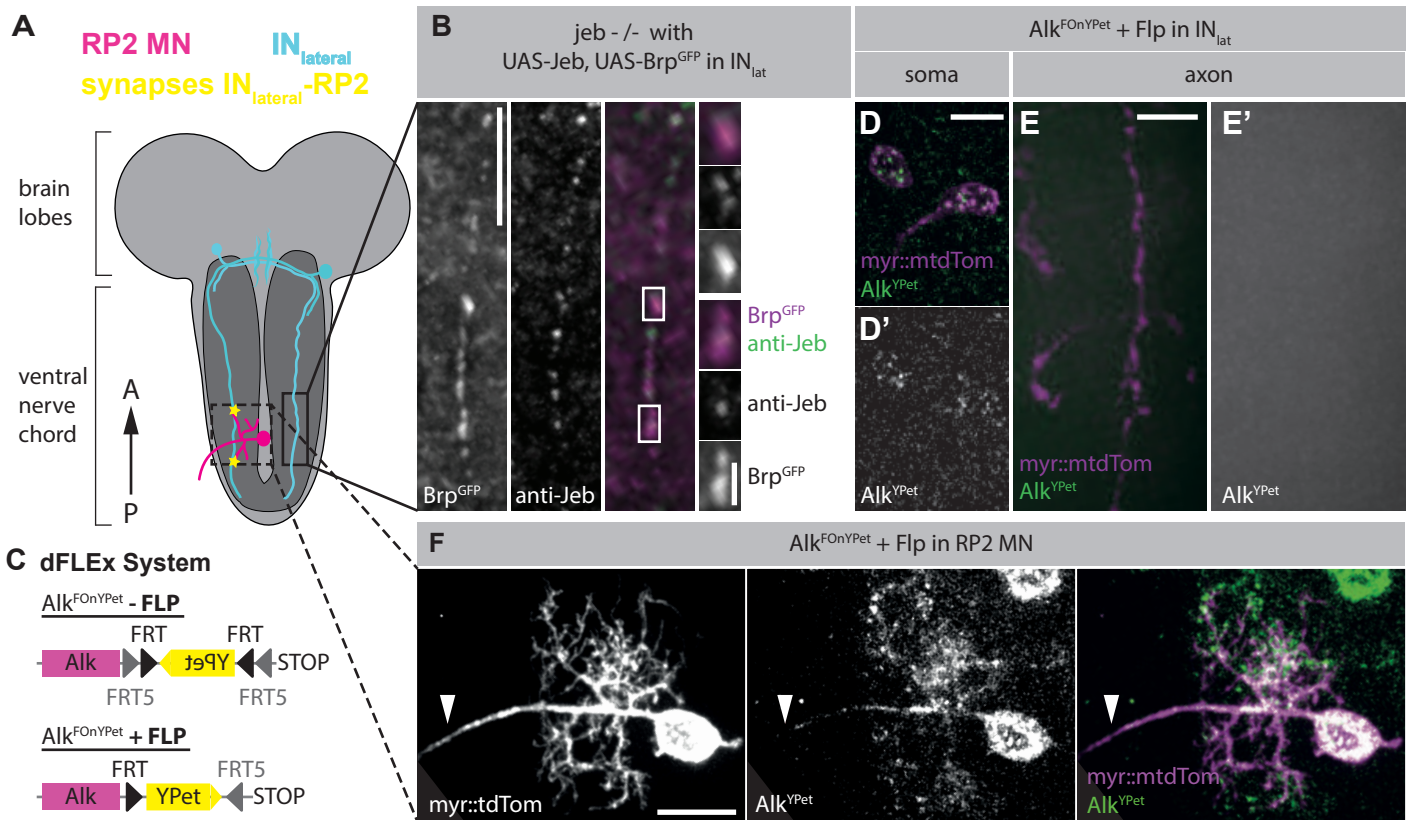

### Figure 1. Subcellular localization of Jeb and Alk suggests synaptic anterograde signaling pathway.

A – Schematic overview depicting the identified pair of pre- (IN<sub>lat</sub> interneuron, cyan) and post- synaptic (RP2 motorneuron, magenta) partner neuron in the ventral nerve cord (VNC) of *Drosophila* larvae; neuropil (dark grey), synaptic contact (asterisk).

B – Jeb (anti-Jeb) localizes to presynaptic release sites (BrpShort<sup>GFP</sup>) along IN<sub>lat</sub> axons when Jeb expression is reinstated to IN<sub>lat</sub> in *jeb* mutant background.

C - Schematic of the conditional Alk<sup>FOnYPet</sup> allele to label endogenous Alk expression. In cells that express FLP recombinase, a cassette between orthologous FRT and FRT5 will be stably inverted and thus leads to tagging of Alk at its endogenous genomic locus with a FLP dependent on-switchable YPet fluorophore (FOnYPet). Details in Fig S1 and STAR methods.

D-E – Induced Alk<sup>FOnYPet</sup> (D, green) reveals endogenous Alk<sup>YPet</sup> localization to IN<sub>lat</sub> soma (D, magenta); IN<sub>lat</sub> axons are devoid of Alk<sup>YPet</sup> (E, E').

F – Alk<sup>YPet</sup> localizes to RP2 soma, primary neurite and dendrites, but does not enter the axon leaving the VNC (arrowhead).

Scale bar = 2 μm (B, magnification), 10 μm (B, C, D), 20 μm (F)

## Figure 2

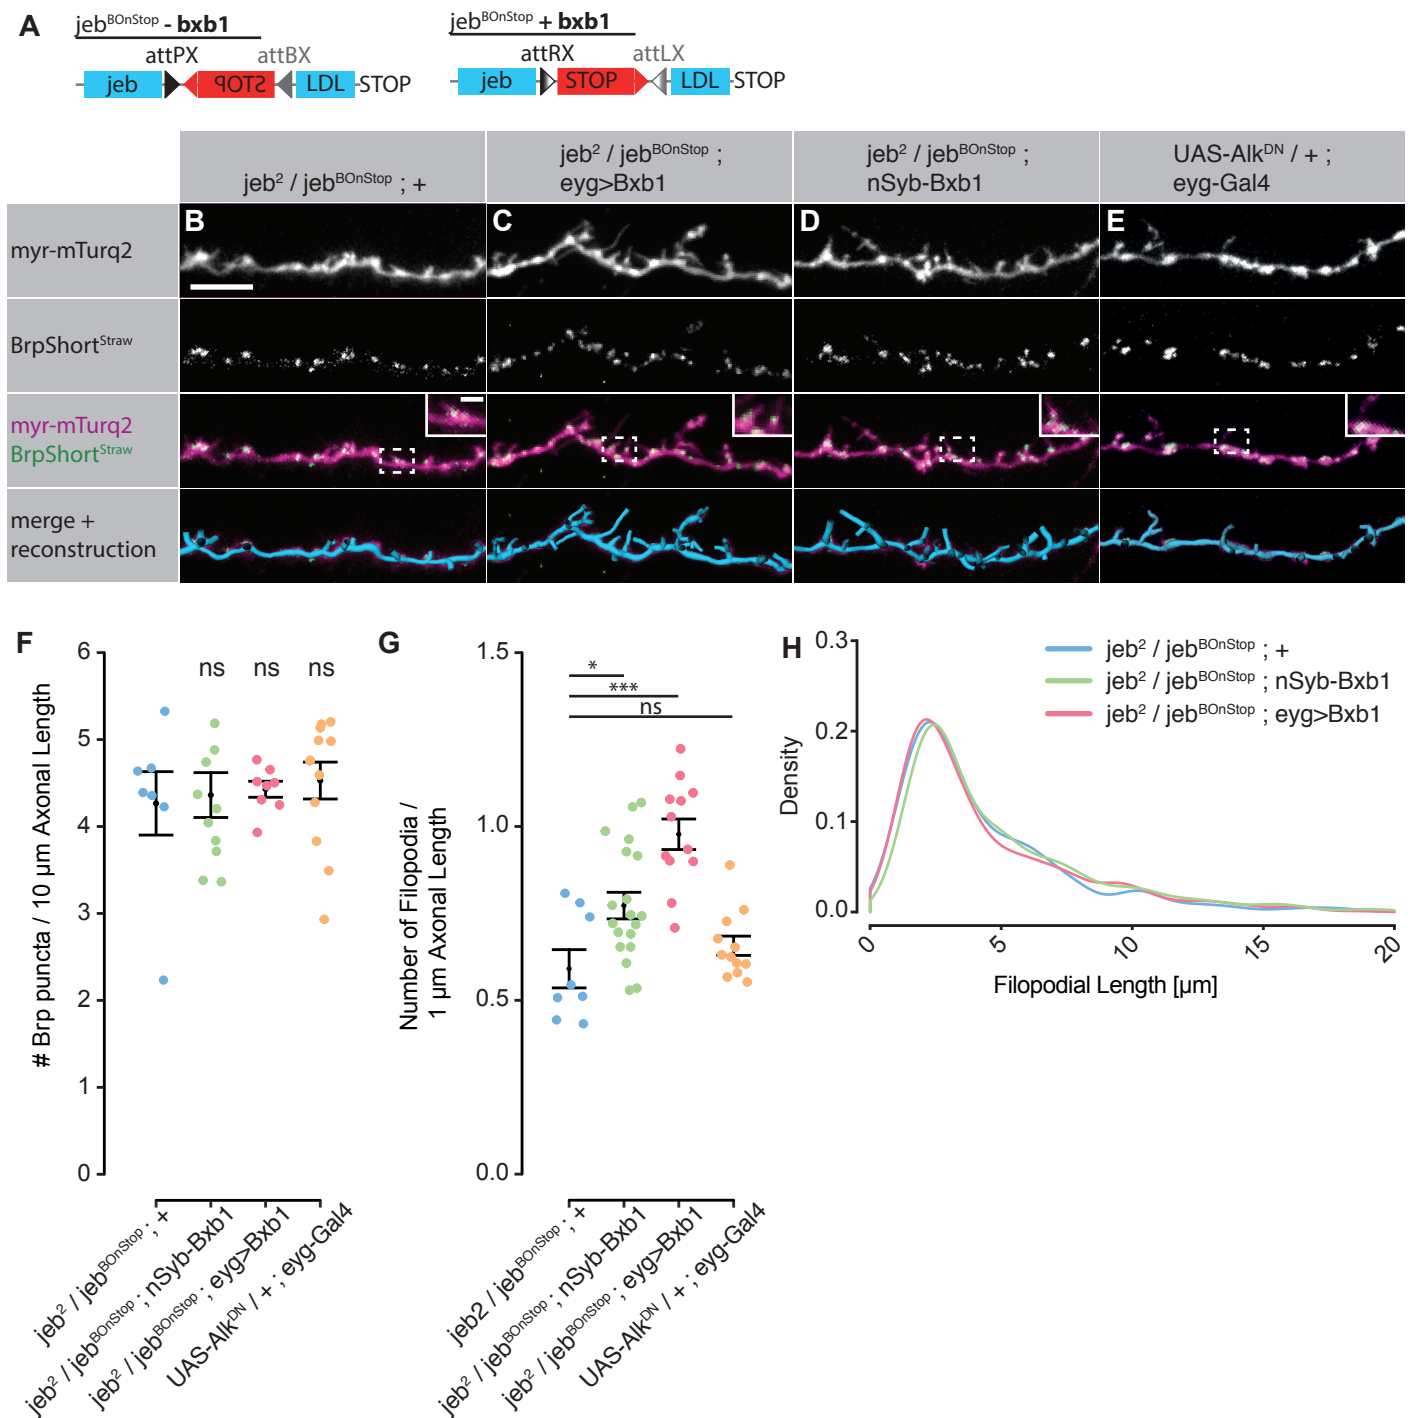

### Figure 2. Presynaptic *Jeb* inhibits presynaptic filopodial growth via non-cell-autonomous feedback

**A** – Schematic of the conditional mutant *jeb*<sup>BOnStop</sup> (*Bxb1* dependent on-switchable STOP Codon) allele. Targeted *Bxb1* integrase expression mutates *Jeb* in selected cells by induced inversion of an engineered exon to terminate translation and transcription immediately preceding the type A LDL receptor domain. For details see Figure 2S.

**B-E** – (B) Control *IN*<sub>lat</sub> axons (*myr::mTurq2*) at 48 h ALH are decorated with filopodial protrusions, many of which harbor a presynaptic specialization (*BrpShort*<sup>straw</sup>) at their insertion into the axon trunk (inserts). Presynaptic specializations were not found to enter filopodia. Targeted *Jeb* loss of function (C) exclusively in *IN*<sub>lat</sub> and (D) in all neurons gives rise to increased filopodial growth, without obvious effects on numbers and localization of presynaptic specializations. (E) Inhibition of *Alk* signalling in *IN*<sub>lat</sub> does not affect numbers of release sites, nor axonal morphology.

**F** – Quantification of presynaptic specialization (*BrpShort*<sup>strawberry</sup>) density along *IN*<sub>lat</sub>.

**G** – Quantification of the numbers of filopodia along *IN*<sub>lat</sub> axons. Normalized as numbers of filopodia per 1  $\mu$ m axonal length.

**H** – Density plot detailing the frequency of filopodial lengths reveals that overall filopodial morphology is unaffected by the loss of *Jeb* expression or inhibition of *Alk*.

\**p*<0.05, \*\**p*<0.01, \*\*\**p*<0.001, ns – not significant

## Figure 3

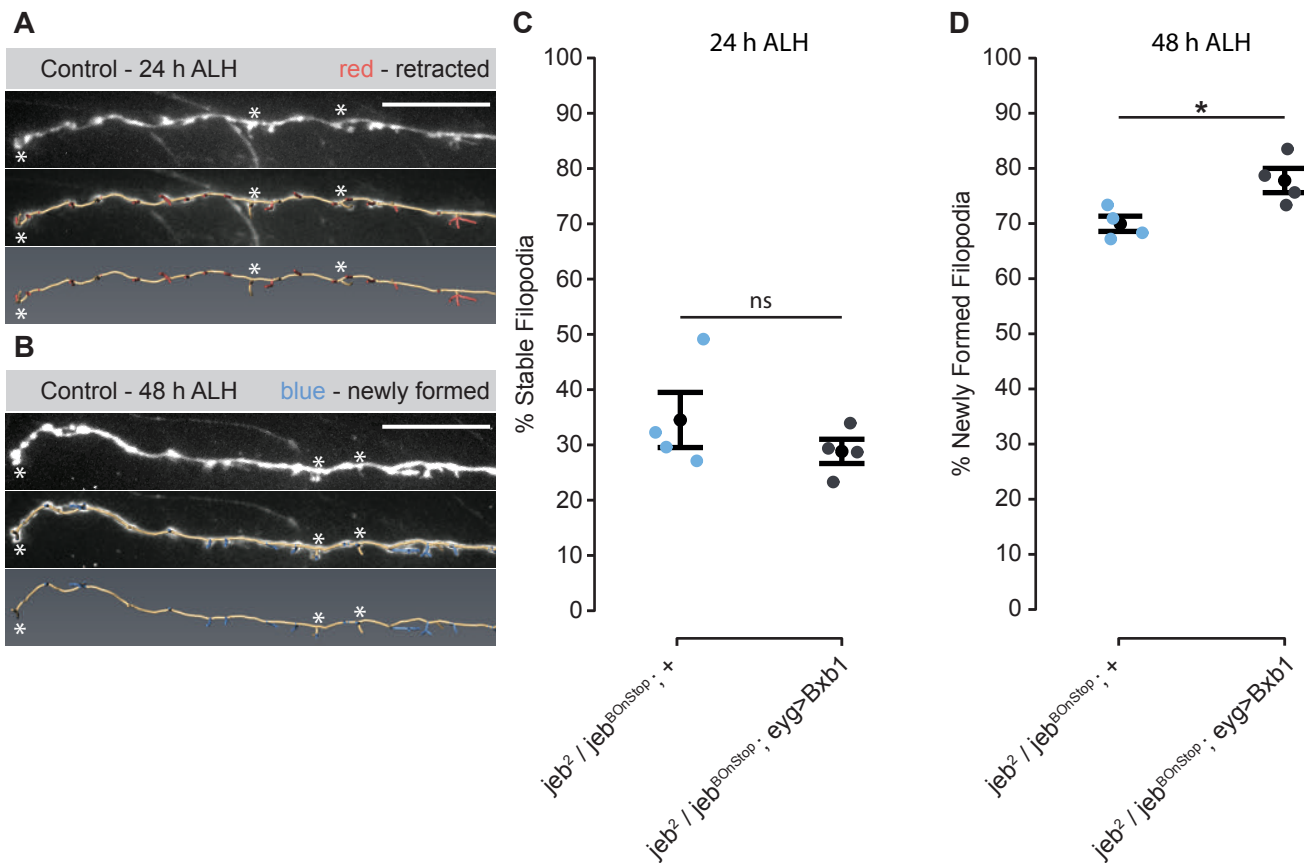

### Figure 3. High structural turnover dynamics of INlat presynaptic filopodia are only slightly affected by loss of Jeb

A, B – Intra-vital recordings of INlat (*myr::mtdTom*) in (A) anesthetized larvae at 24 h and (B) in acutely dissected nerve cords at 48 h ALH. Lower panels show an overlay with the 3D reconstruction of cell morphology. Red - Filopodia present at 24 h, and retracted until 48 h ALH; Blue - newly arising filopodia from 24 - 48 h. Asteriks - examples of persisting filopodia.

C – Quantification of the proportion of filopodia removed from 24 to 48 h ALH (red in A). Loss of Jeb in INlat has no obvious effect on stability of individual filopodia in comparison to control.

D - Quantification of the proportion of filopodia that newly form from 24 to 48 h ALH (blue in B). Loss of Jeb in INlat causes a slight increase in the proportion of newly formed filopodia in comparison to control.

\* $p < 0.05$ , ns – not significant

## Figure 4

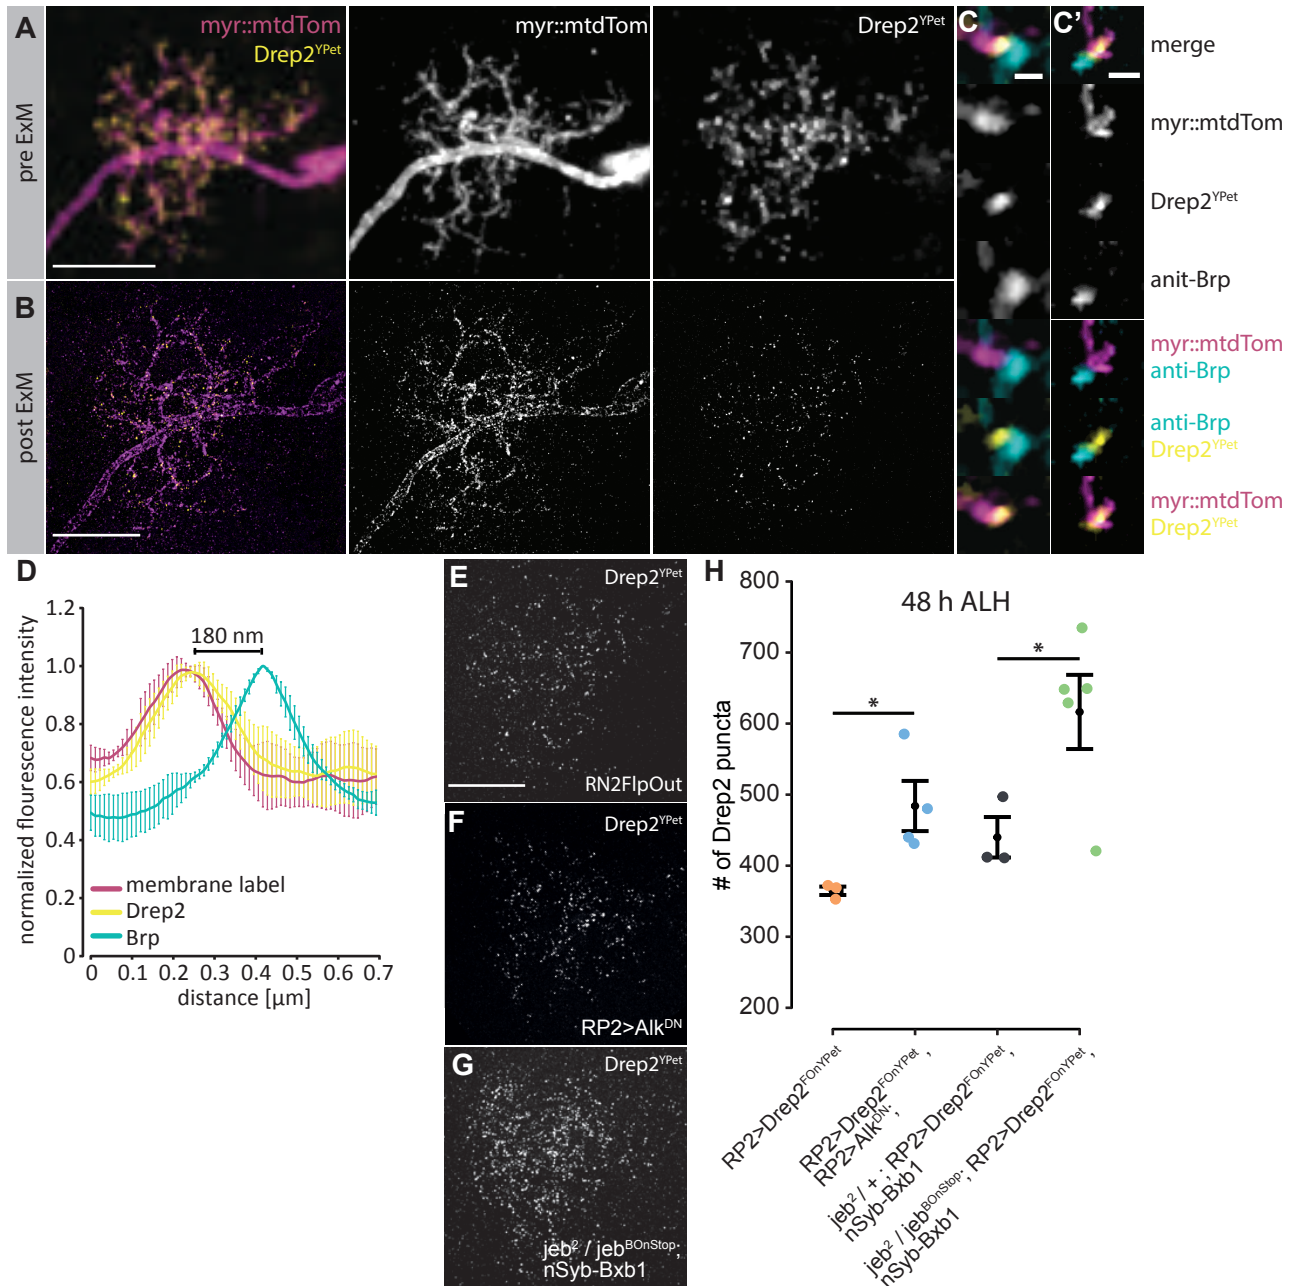

### Figure 4. Jeb-Alk signaling inhibits formation of postsynaptic specializations

A – RP2 motorneuron (*myr::mtdTom*) with induced *Drep2<sup>FOnYPet</sup>* imaged with confocal microscopy, demonstrating dendritic localization of *Drep2<sup>YPet</sup>*.

B – The same RP2 motorneuron as in (A), now imaged with expansion microscopy (ExM). Individual postsynaptic specializations can now be distinguished and therefore accurately quantified.

C-C' - Partial maximum intensity z-projections showing representative synapses along dendritic branches in (B). Mature synapses are identified by apposition of postsynaptic *Drep2<sup>YPet</sup>* (anti-GFP, yellow) with presynaptic Brp (anti-Brp, cyan). RP2 membrane is labeled with *myr::mtdTom* (magenta).

D – Normalized mean intensity profile of *Drep2<sup>YPet</sup>* (yellow), Brp (cyan) and dendritic membrane label (*myr::mtdTom*, magenta) across synaptic contacts. *Drep2<sup>YPet</sup>* localization intimately overlaps with the dendritic membrane. The distance between mean intensity maxima of *Drep2<sup>YPet</sup>* and the cytosolic terminal (C-Term) of Brp was measured as 180nm. n=15 synapses from 3 RP2 dendrites.

E-G – Max. intensity z-projections of endogenous *Drep2<sup>YPet</sup>* in RP2 dendrites after ExM in (E) control, (F) pan-neuronal *jeb* mutant, and (G) single cell Alk inhibition.

H – Quantification of the number *Drep2<sup>YPet</sup>* apposed with Brp along RP2 dendrites at 48 h ALH demonstrates that Jeb-Alk signaling inhibits formation of postsynaptic specializations. Welch two-sample t-test \*p<0.05. Scale bar = 10  $\mu\text{m}$  (A,B,E) 500 nm (C)



## Figure 5

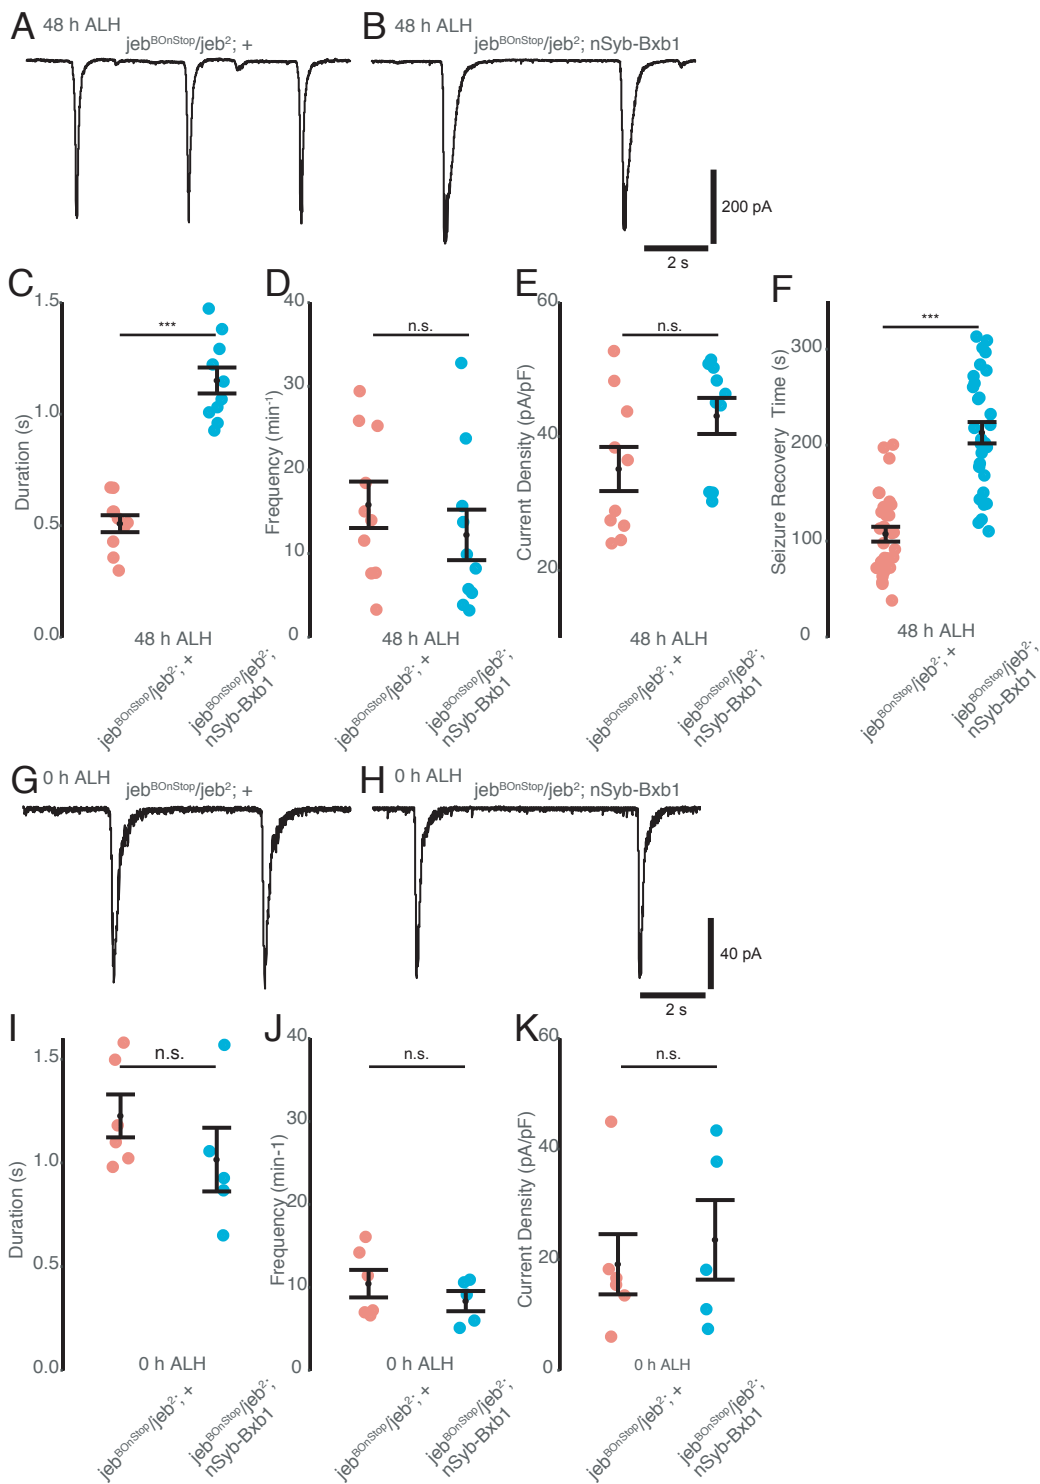

### Figure 5. Pan-neuronal loss of *Jeb* results in an developmental increase of synaptic excitation and epilepsy-like seizure phenotype.

A-E – Whole-cell patch recordings of SRCs from identified RP2 motoneurons in dissected larvae at 48h ALH, from control (A) and pan-neuronally *Jeb*<sup>-/-</sup> (B) animals. Loss of *Jeb* causes strongly increased synaptic excitation at 48h ALH evident by increased SRC duration (C), without significant changes to SRC frequency (D) and current density (E).

F – Seizure recovery times after electro-shock are doubled in pan-neuronally *Jeb*<sup>-/-</sup> larvae at 48h ALH larvae in comparison to control.

G-K – SRCs recorded at 0h ALH from RP2 motoneurons are indistinguishable between control (G) and pan-neuronal *Jeb*<sup>-/-</sup> (H) larvae: SRC duration (I), frequency (J) and current density (K) are not significantly different.

\*\*\*p<0.001, ns – not significant

Figure 6

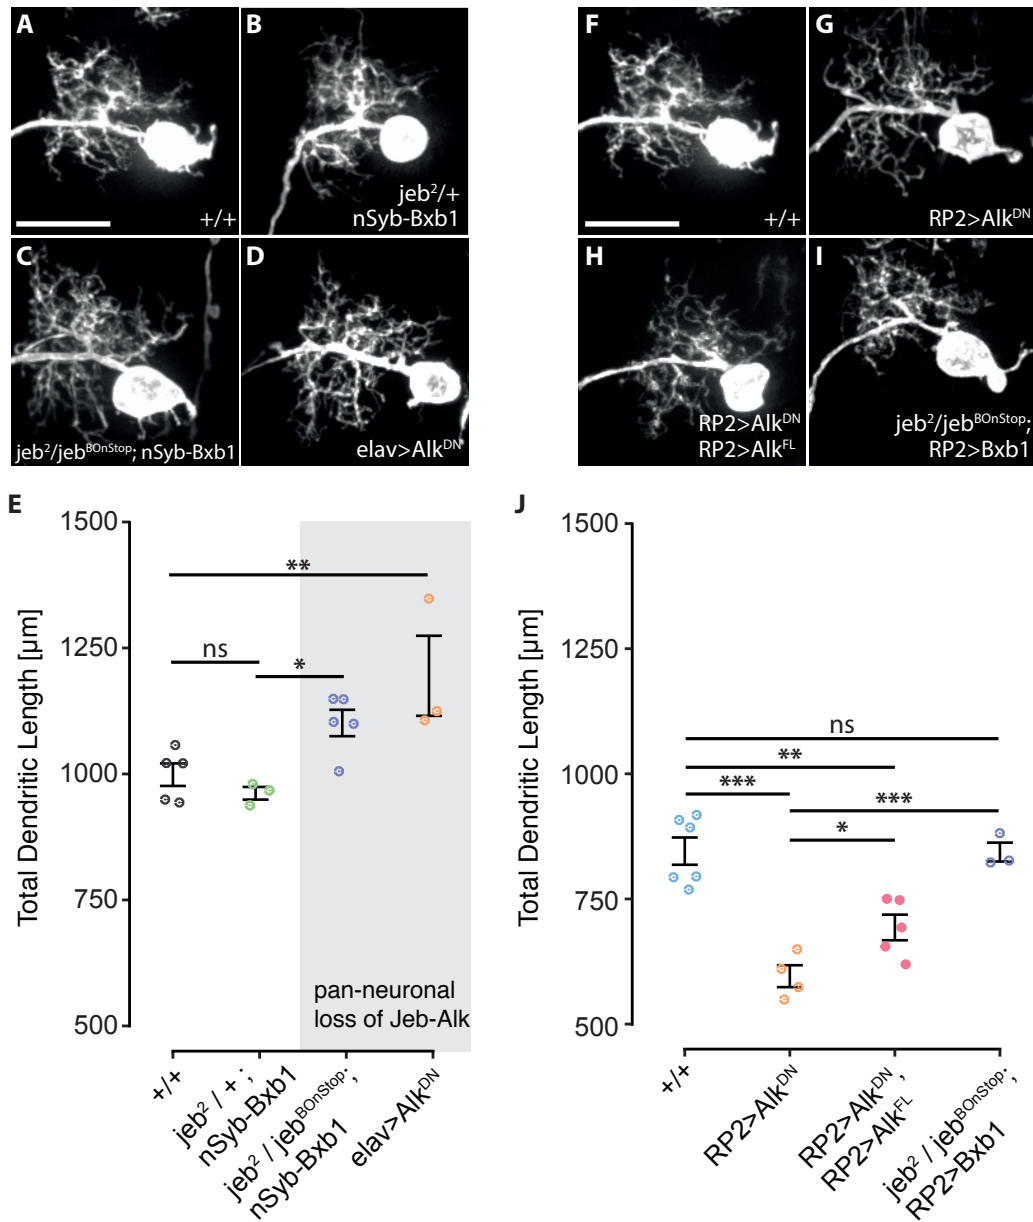

**Figure 6. Cell-autonomous and pan-neuronal abrogation of Jeb-Alk signalling results in distinct growth phenotypes of RP2 motorneuron dendrites.**

A-E – Dendrites (RP2>myr::YPet) grow larger under pan-neuronal abrogation of Jeb-Alk signalling. (A,B) control, (C) pan-neuronal jeb mutant (nSyb>Jeb<sup>BOnStop</sup>), and (D) pan-neuronal Alk inhibition (Elav> Alk<sup>DN</sup>). (E) Quantification of RP2 total dendritic length in genotypes shown in A-D.

F-J – Dendritic growth is reduced upon cell-autonomous inhibition of Alk signalling in RP2 only. (F) control, (G) cell-autonomous Alk inhibition in RP2 motorneuron (RP2>Alk<sup>DN</sup>), (H) co-overexpression of Alk<sup>DN</sup> and full-length Alk (Alk<sup>FL</sup>) in RP2, and (I) induced jeb mutation in RP2 only. (J) Quantification of RP2 total dendritic length in genotypes shown in (F-I).

\*p<0.05, \*\*p<0.01, \*\*\*p<0.001, ns – not significant

## Figure 7

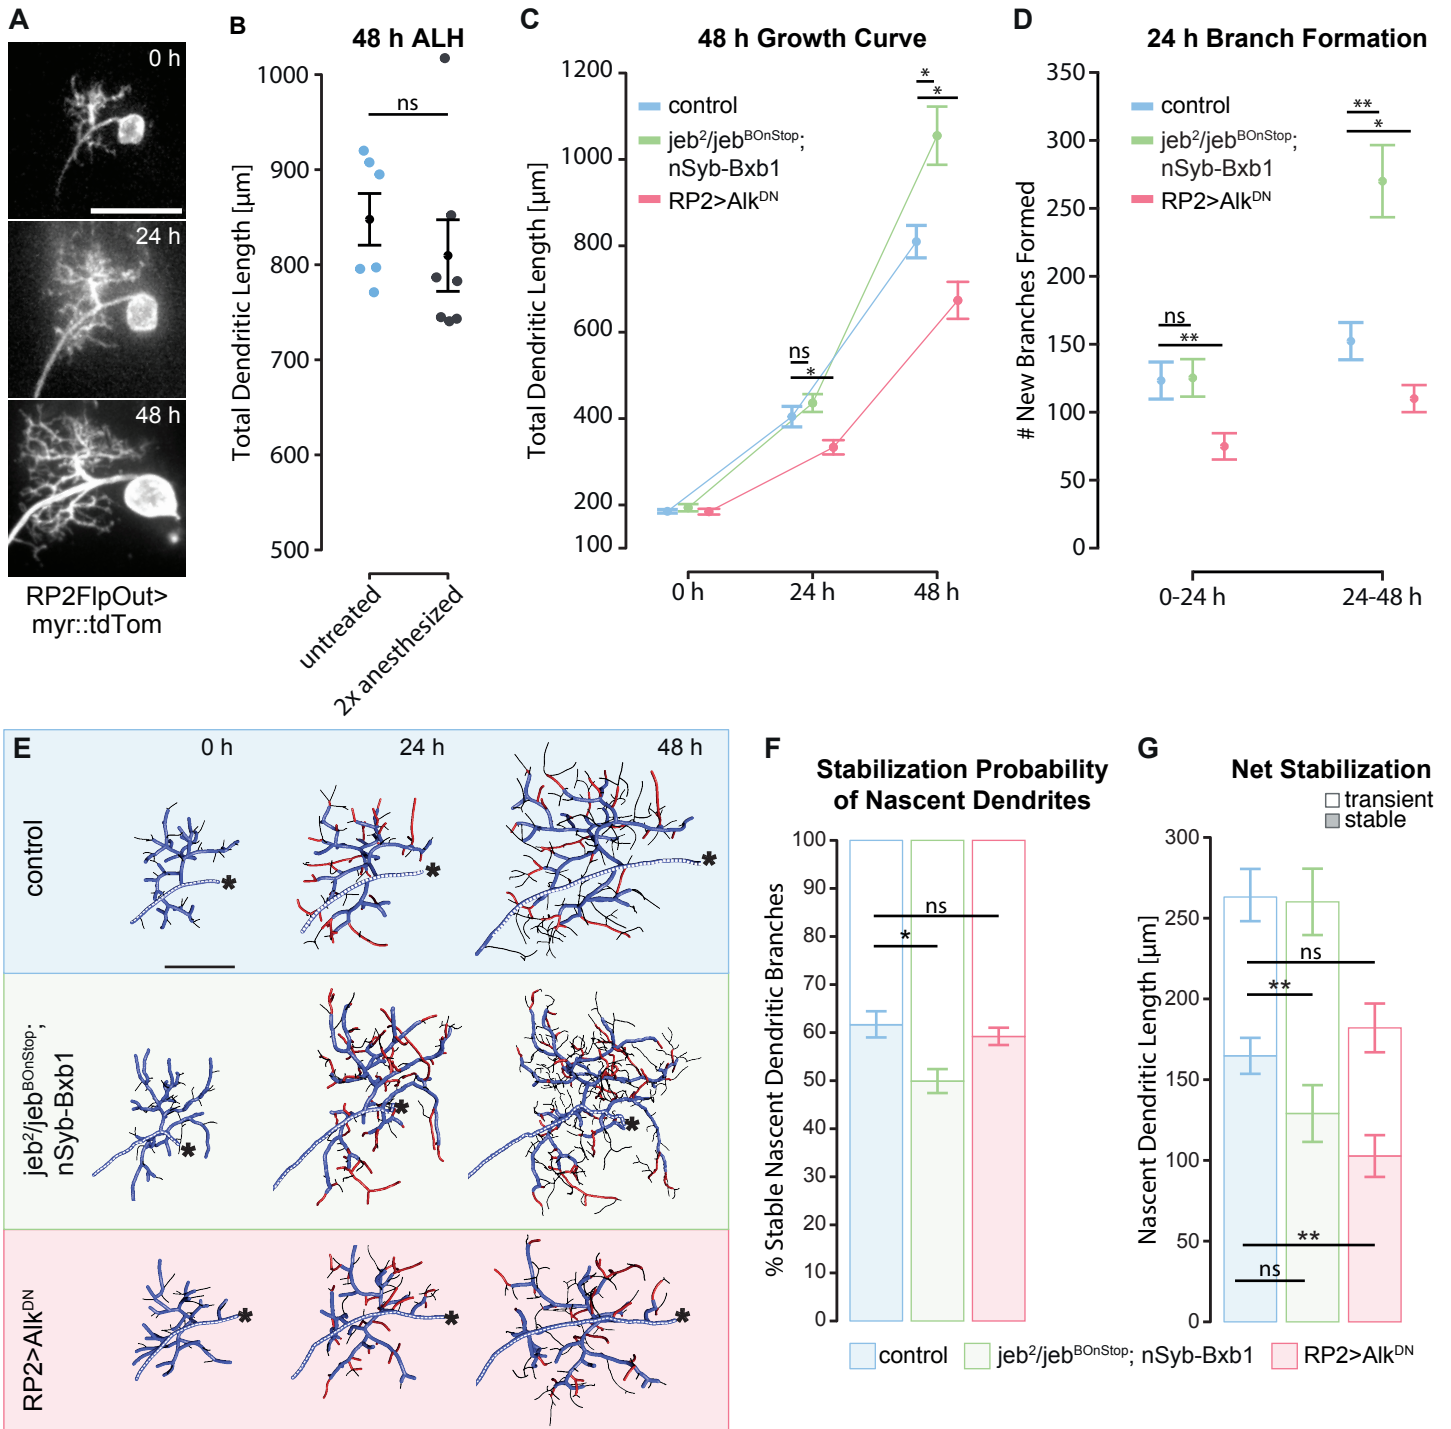

**Figure 6. RP2 dendritic turnover dynamics scale with presynaptic filopodia dynamics.**

A – Intra-vital imaging of RP2 dendrites at 24 h intervals. Recordings at 0 and 24 h ALH were acquired from anesthetized larvae. At 48 h ALH, the VNC was dissected and acutely imaged. Scale bar – 20  $\mu$ m

B – Quantification of total dendritic length shows that dendrite development is not significantly affected by twice repeated anesthetization during intra-vital imaging in comparison to untreated control.

C – Quantification of total dendritic length from intra-vital recordings reveals that Jeb-Alk signalling regulates progressive dendritic growth exclusively during postembryonic stages. RP2 cell-autonomous inhibition of Alk (red) slows postembryonic dendritic growth; pan-neuronal loss of Jeb (green) causes progressively increasing dendritic growth in comparison to control (blue). Embryonic dendritic development is not regulated by Jeb-Alk, evident by the lack of obvious dendritic phenotypes at 0 h ALH.

D – Quantification of the formation of new dendritic branches shows that RP2 cell-autonomous inhibition of Alk signalling (red) slows progressive dendritic growth due to a reduced rate of branch formation. In contrast, pan-neuronal abrogation of Jeb ( $nSyb>Jeb^{BOnStop}$ ) promotes branch formation from 24 – 48 h ALH in comparison to control.

E – Reconstructions of RP2 dendrites, colour-coded for branch lengths that were a) stable over all three timepoints (blue); b) newly formed from 0 to 24 h ALH, and stabilized until 48 h ALH (red); c) filopodia not covered by a) and b) (black). Asterisk - position of cell body.

F – Quantification of the stabilization probability of nascent dendritic branches. The percentage of branches that newly formed from 0 to 24 h ALH, and subsequently stabilized until 48 h ALH, is significantly reduced under pan-neuronal loss of Jeb, but not affected by RP2 cell-autonomous inhibition of Alk in comparison to control.

G – Quantification of the net addition of dendritic length. Stacked bar plots show the summed length of dendritic branches that formed from 0 to 24 h ALH and a) persisted until 48 h ALH (stable length), or b) subsequently retracted (transient length). Dendrites in pan-neuronal jeb mutant background display reduced net growth despite an increased branch formation from 24 – 48 h ALH.

Blue – control ( $RP2>myr::mtdTom$ ); Green - pan-neuronal loss of Jeb ( $nSyb>Jeb^{BOnStop}$ ); red – RP2 cell-autonomous inhibition of Alk ( $RP2>Alk^{DN}$ ). \* $p<0.05$ , \*\* $p<0.01$ , ns – not significant

Figure S1, related to Figure 2

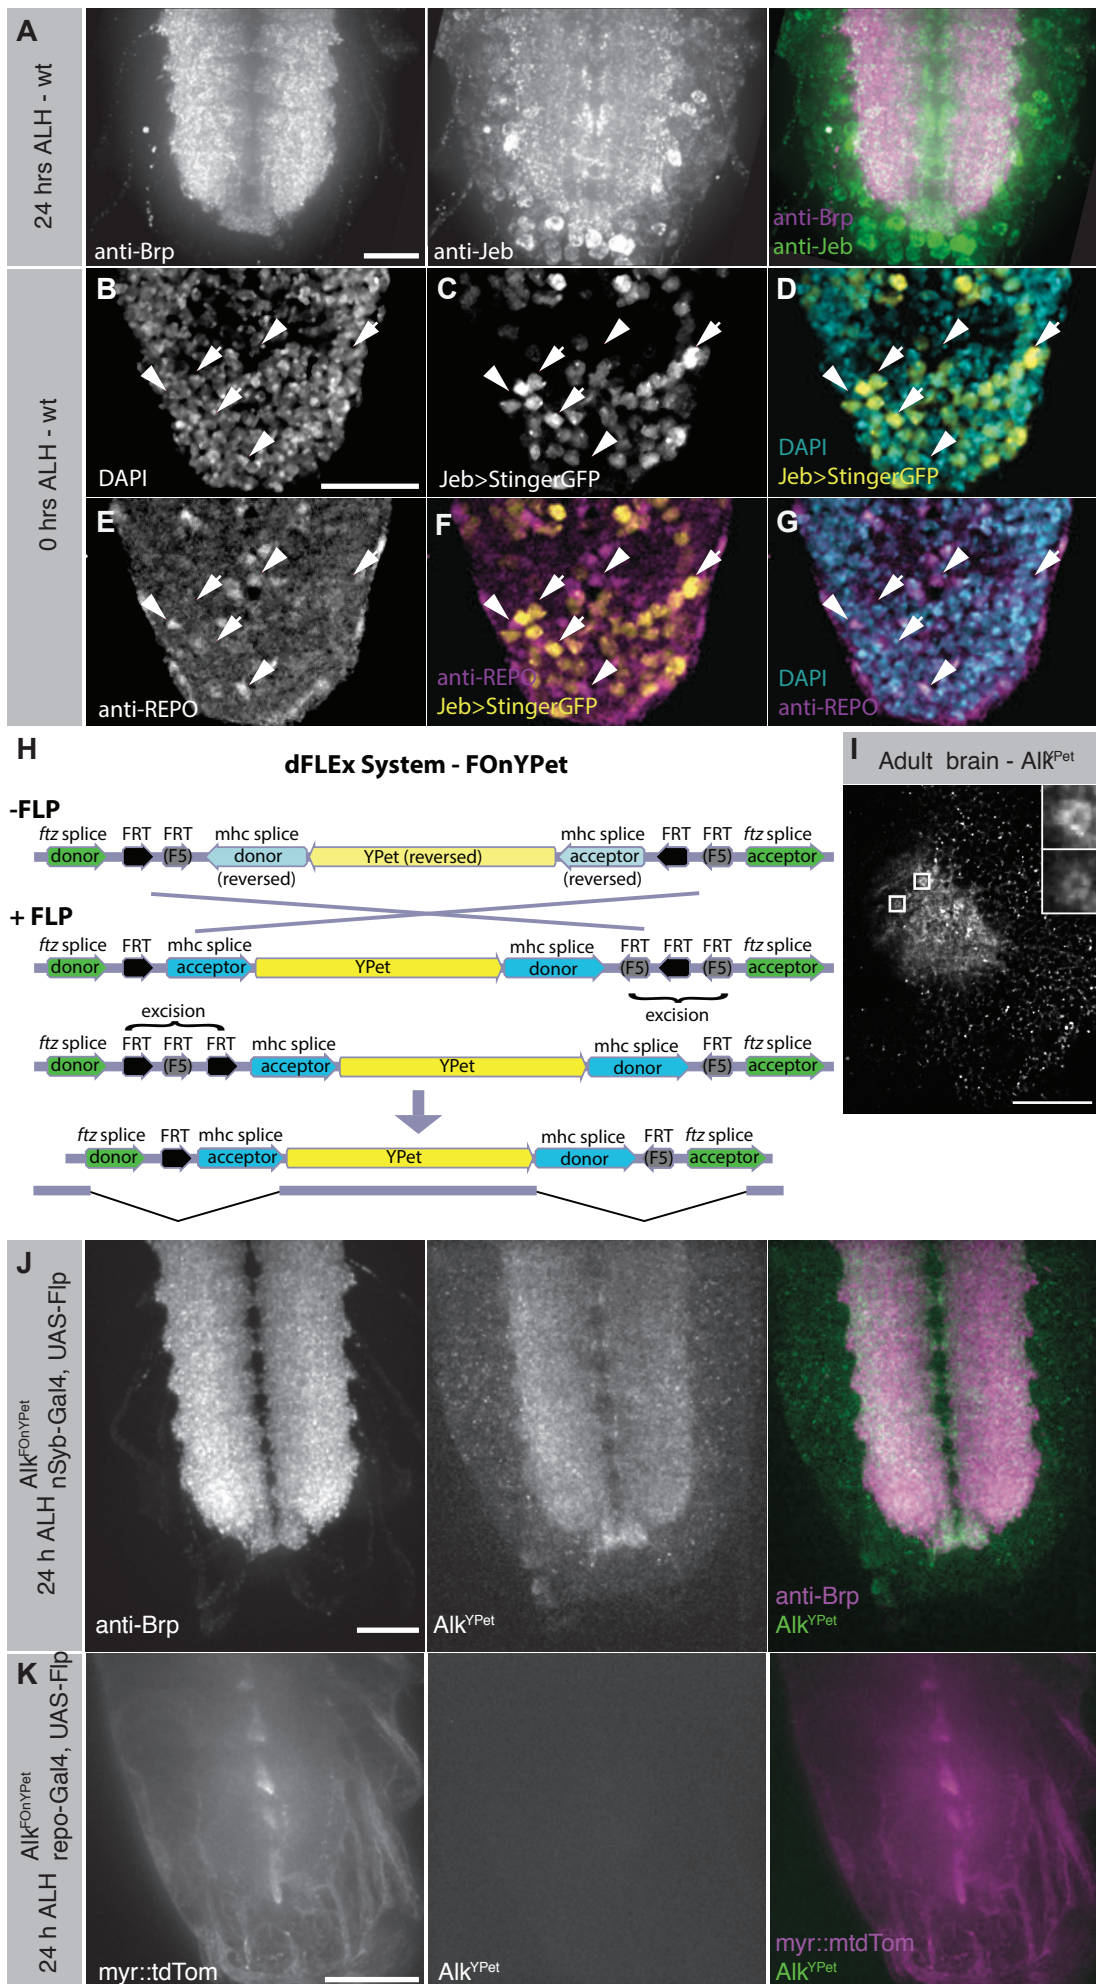

**Figure S1. Jeb and Alk are expressed in neurons, but not glia.**

A – Jeb (anti-Jeb) strongly localizes to the neuropile ( $\alpha$ -Brp), and more weakly to cell bodies. B-G – Jeb is expressed in neurons, but not glia. *jeb* translational activity (*Jeb-T2A-Gal4*) is reported by GFP (yellow; *UAS-StingerGFP*) localizing to nuclei (DAPI, cyan). Jeb translation is evident in neurons (arrows), but not glial cells (anti-REPO, arrowheads).

H – Schematic of the dFLEX system depicting the FOnYPet construct (FLPase dependent on-switchable YPet fluorophore). A YPet fluorophore is flanked by splice acceptor and donor as well as orthogonal FRT and FRT5 sites. FLPase expression induces DNA inversion between corresponding FRT or FRT5 sites; this inversion is subsequently stabilized by DNA excision between corresponding FRT sites.

I – Constitutive, endogenously labeled Alk<sup>YPet</sup> (after FLP event in germline) reveals Alk localization to postsynaptic structures of microglomeruli (insets) in the mushroom body calyx.

J – Induction of Alk<sup>FOnYPet</sup> in all neurons reveals strong Alk<sup>YPet</sup> (green) localization to the neuropile (anti-Brp, magenta), and weaker to neuronal cell bodies.

K – Induction of Alk<sup>FOnYPet</sup> in glia cells (*repo>myr::mtdTom*) does not yield detectable levels of Alk<sup>YPet</sup> in the ventral nerve cord.

Scale bar = 20  $\mu$ m (A, B-G, J, K), 100  $\mu$ m (I)

## Figure S2

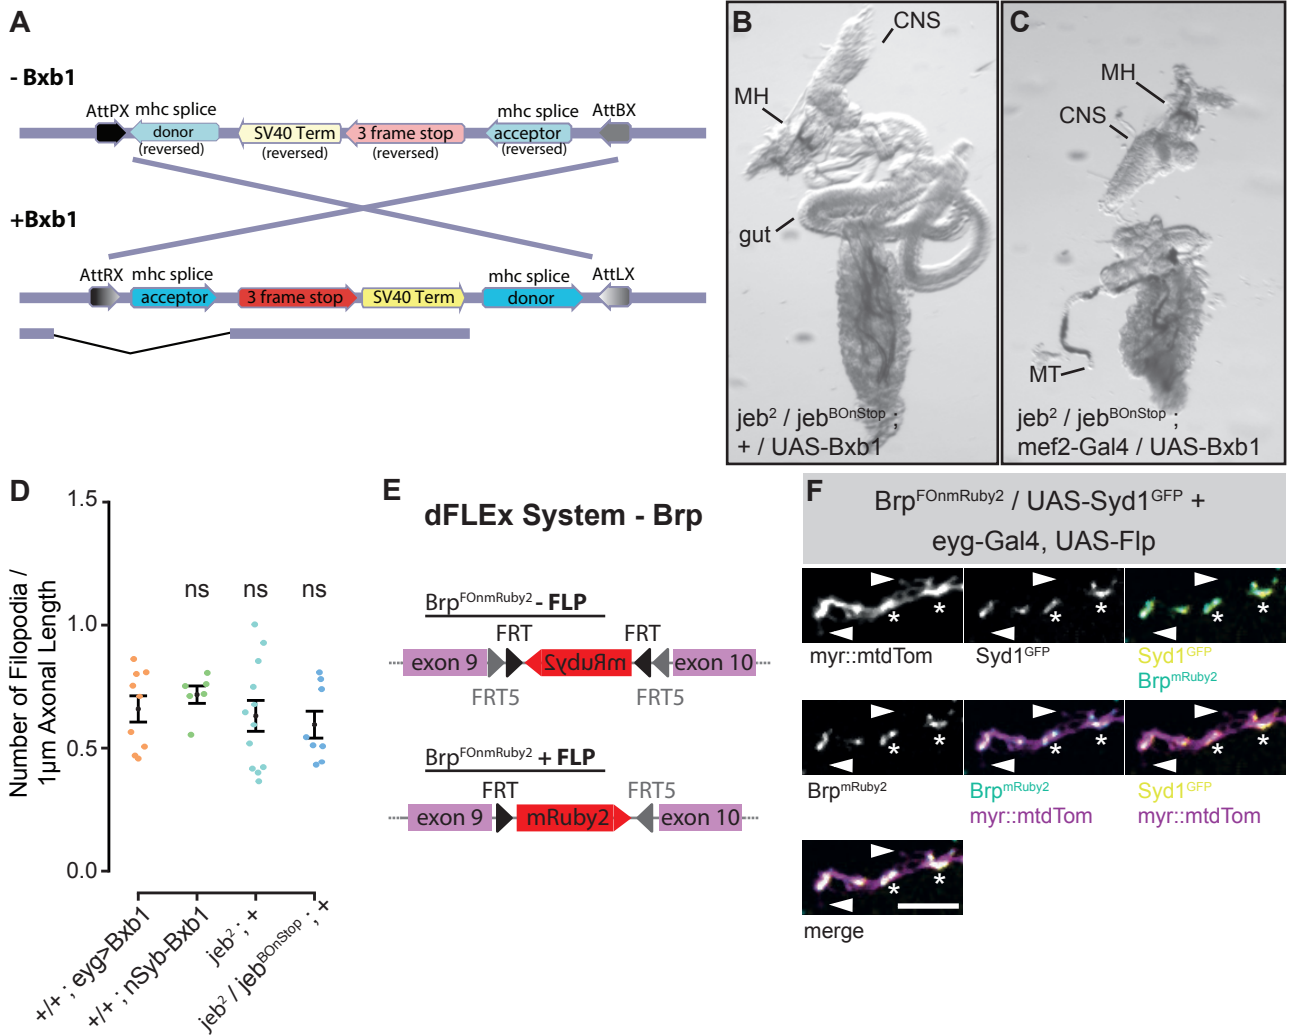

**Figure S2.**

A – The BOnStop construct consists of a Stop codon in all 3 frames and an SV40 termination sequence, flanked by mhc splice acceptor/donor and AttPX / AttBX sites. Bxb1-integrase cuts at AttPX / AttBX sites and locks the cassette in inverted orientation by conversion of AttPX / AttBX to AttRX / AttLX sequences. When placed in a gene's coding intron, Bxb1 expression thus induces targeted mutation by premature termination of transcription and translation.

B,C – (B) Transheterozygous combination of the *jeb<sup>BOnStop</sup>* allele over *jeb<sup>2</sup>* allows normal gut development. (C) Induction of *jeb<sup>BOnStop</sup>* to the mutant *jeb<sup>Stop</sup>* allele by Bxb1 expression in the early mesoderm (*mef2>bx1*) reliably disrupts gut formation.

D – Quantification of the numbers of filopodia along IN<sub>lat</sub> axons confirming that increased filopodial growth in induced *jeb<sup>BOnStop</sup>* condition is specific to loss of Jeb (Fig 2B-G), and not caused by individual components of the BOnStop technique.

E - Schematic of the Brp<sup>FOmRuby</sup> allele. The FOmRuby construct is inserted between *brp* exons 9 and 10 (magenta) at the MiMIC site MI02987.

F – Co-expression (*eyg-Gal4, UAS-Flp*) of Brp<sup>FOmRuby2</sup> (cyan) and UAS-Syd1<sup>GFP</sup> (yellow) in IN<sub>lat</sub> (magenta). Syd1 and Brp colocalize within the axon (asterisks) but do not locate to filopodia (arrowhead), demonstrating that neither immature nor mature presynaptic release sites form in presynaptic filopodia.

## Figure S3, related to Figure 4

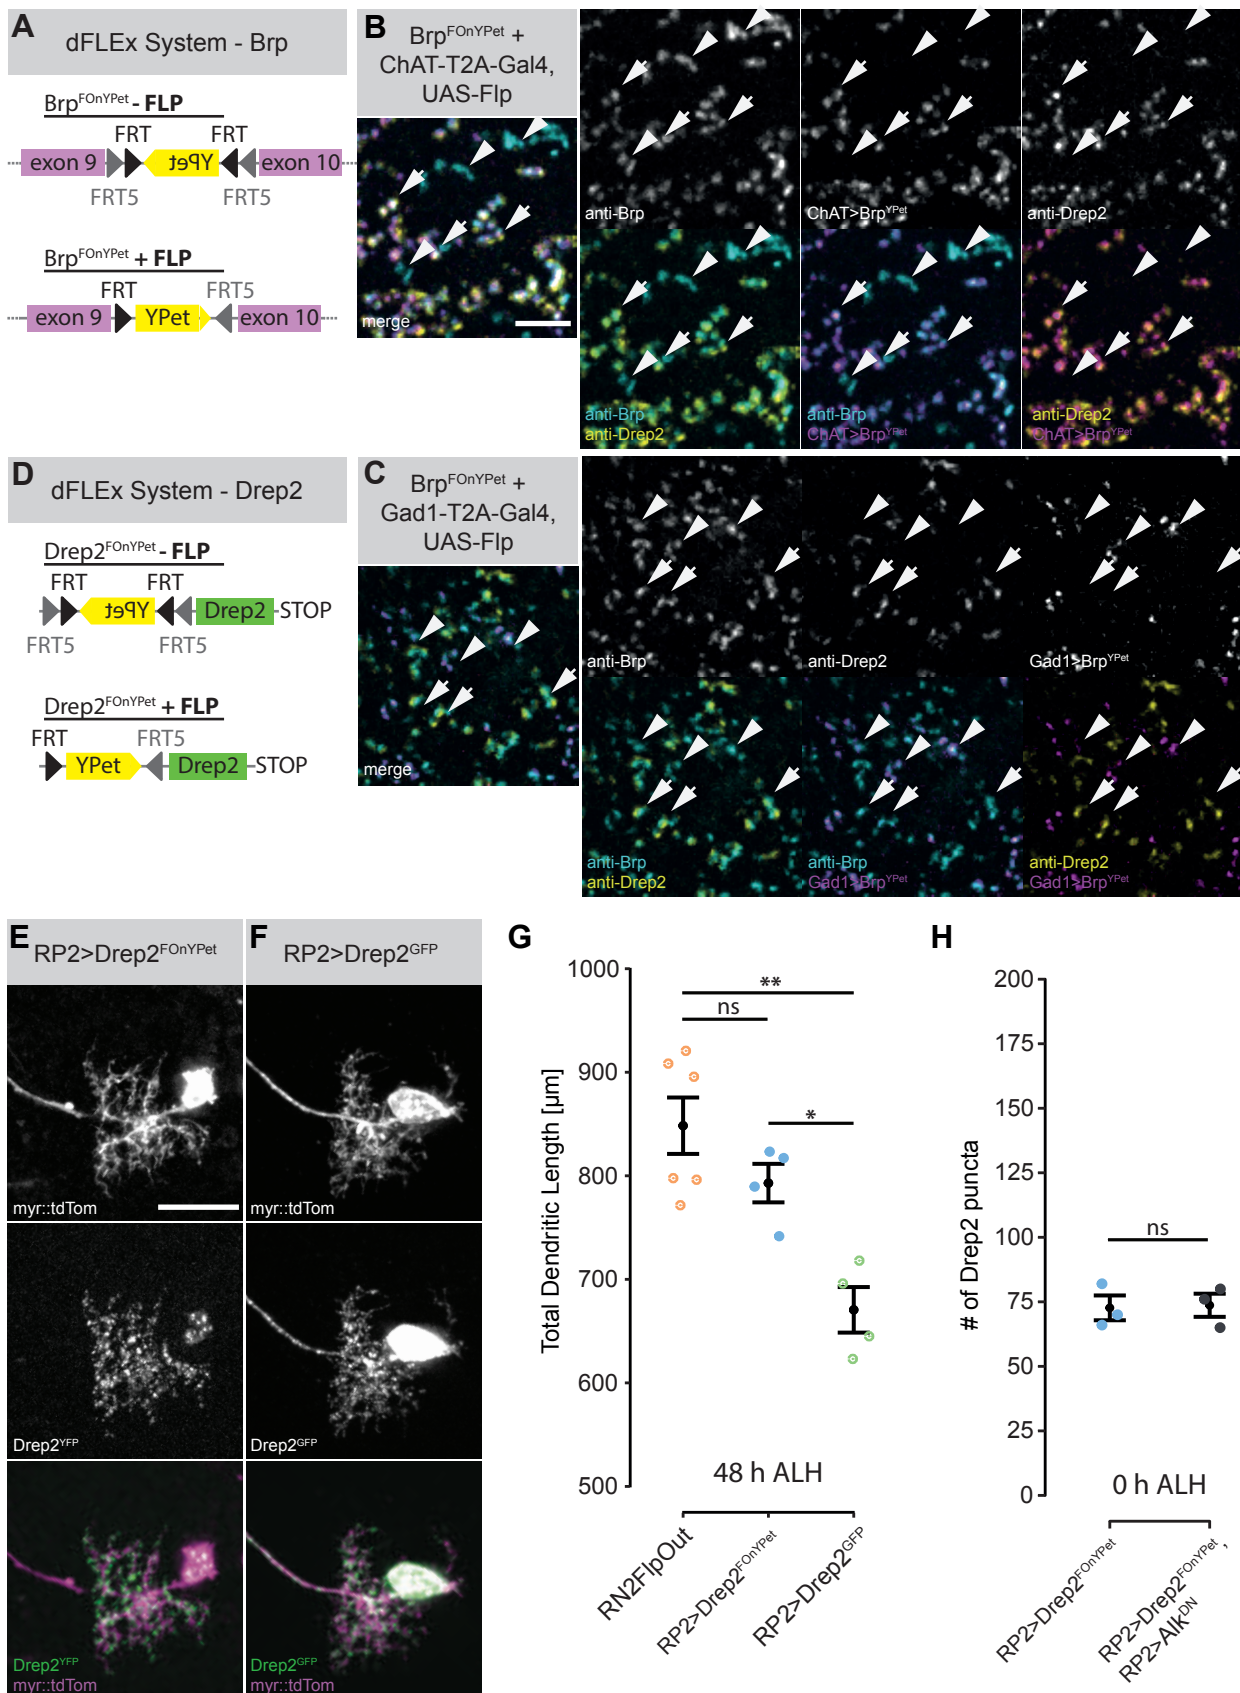



**Figure S3. Endogenously labeled Drep2<sup>FOnYPet</sup> does not affect dendritic growth.**

A - Schematic of the Brp<sup>FOnYPet</sup> allele.

B,C – Expansion microscopy demonstrates that (B) cholinergic presynaptic specializations (arrows; Brp<sup>FOnYPet</sup>, ChAT>UAS-Flp) appose Drep2 profiles (anti-Drep2, yellow). Other types of presynaptic specializations (arrowheads, anti-Brp, cyan) are not paired with Drep2 profiles. (C) Brp<sup>YPet</sup> expressed in GABAergic neurons (Brp<sup>FOnYPet</sup>, Gad1> Flp) does not appose Drep2 puncta (anti-Drep2, yellow).

D - Schematic of the Drep2<sup>FOnYPet</sup> allele. FLP expression induces endogenous Drep2 labeling with a YPet fluorophore (yellow) at the 5'-end of Drep2 (green).

E,F – Comparison of RP2 motorneuron dendrites (myr::mtdTom), (E) with endogenously labeled Drep2<sup>YPet</sup> (Drep2<sup>FOnYPet</sup>, RP2>FLP), and (F) overexpression of Drep2<sup>GFP</sup>. Overexpression of Drep2<sup>GFP</sup> reports artefactually high concentration of Drep2 in the cell body, primary neurite, axon and throughout the dendritic arbor compared to endogenous Drep2<sup>YPet</sup>.

G – Quantification of RP2 dendritic length in control, endogenously labeled Drep2<sup>YPet</sup> (RP2>Drep<sup>FOnYPet</sup>) and Drep2<sup>GFP</sup> overexpression (RP2>Drep2<sup>GFP</sup>) reveals that overexpression of Drep2<sup>GFP</sup> causes dendritic undergrowth that can be circumvented using endogenously tagged Drep2<sup>YPet</sup>.

H – Quantification of mature postsynaptic specialization (Drep2<sup>YPet</sup> apposed to anti-Brp profiles) at 0 h ALH shows that embryonic development of postsynaptic specialization is not regulated by Alk signalling. Welch two-sample t-test.

Scale bars = 10  $\mu$ m (B,C), 20  $\mu$ m (E). \*p<0.05, \*\*p<0.01, ns – not significant

## Figure S4: dFLEX<sup>FlpYPet</sup> related to STAR methods

### dFLEX<sup>YPet</sup> linear fragment by gene synthesis

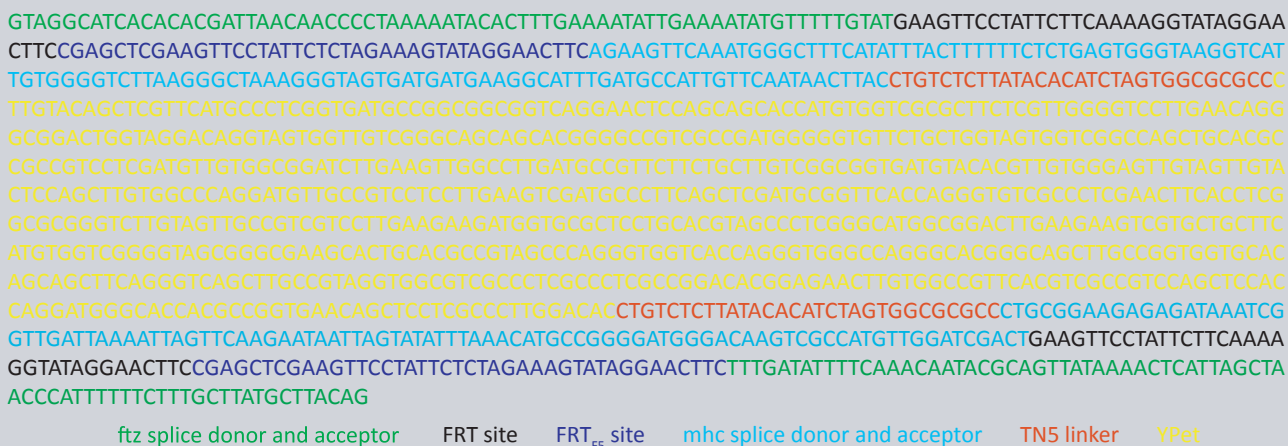

### dFLEX<sup>YPet</sup>-F0

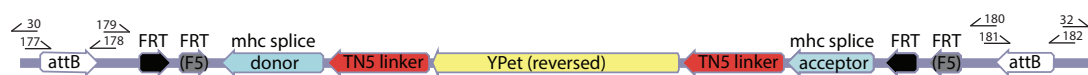

| Primer | Sequence                                     | Template                                                         |
|--------|----------------------------------------------|------------------------------------------------------------------|
| 30     | CAGCACATCCCCCTTTCGCC                         | pBluescript                                                      |
| 32     | GCTCTTCCGCTTCTCGCTC                          |                                                                  |
| 177    | GGCGAAAGGGGGATGTGCTGGCCTTTTTACGTTCTCGCC      | pJFRC18-8XLexAop2-<br>mCD8::GFP                                  |
| 178    | TGGCGTACGGAGGAGACATCCGCCAGCGGTTTCG           |                                                                  |
| 179    | GATGTCTCCTCCGTACGCCAAATATTGAAAATATGTTTTGTAT  | dFLEX <sup>FlpYPet</sup> linear<br>fragment by gene<br>synthesis |
| 180    | GGCCCGCTACACTATAACTTGCATATTGTTTGAAGAATATCAA  |                                                                  |
| 181    | AAGTTATAGTGTAGCGGGCCGAGGTACCTGCAGCAGAGC      | pDONR(nORIENT)-<br>attB-BRP-SNAP-UTR-<br>ICRE-floxRFP            |
| 182    | GAGCGAGGAAGCGGAAGAGCGATATCAGCTGGATGGCGATGTAG |                                                                  |

### dFLEX<sup>YPet</sup>-F1

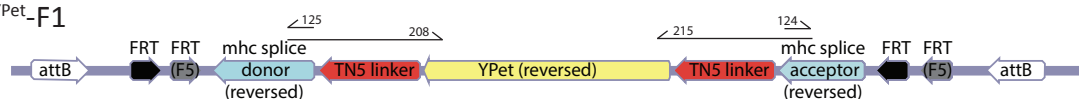

| Primer | Sequence                                                                   | Template                     |
|--------|----------------------------------------------------------------------------|------------------------------|
| 125    | GTAAGTTATTGAACAATGGC                                                       | dFLEX <sup>FlpYpet</sup> -F0 |
| 124    | CTGCGGAAGAGAGATAAATCG                                                      |                              |
| 208    | GCCATTGTTCAATAACTTACCTAGTCTCTTATACACATCTAGTGGCGCGCC<br>CTTGACAGCTCGTTCATGC | dFLEX <sup>FlpYpet</sup> -F0 |
| 215    | GATTTATCTCTCTCCGAGCTGCGTCTCTTATACACATCTCCAGGCGCGCC<br>GTGTCCAAGGGCGAGG     |                              |

### dFLEX<sup>YPet</sup>-F2

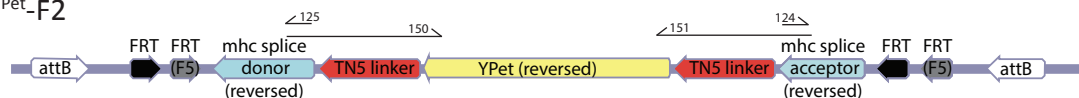

| Primer | Sequence                                                                   | Template                     |
|--------|----------------------------------------------------------------------------|------------------------------|
| 125    | GTAAGTTATTGAACAATGGC                                                       | dFLEX <sup>FlpYpet</sup> -F0 |
| 124    | CTGCGGAAGAGAGATAAATCG                                                      |                              |
| 150    | GCCATTGTTCAATAACTTACCTAGTCTCTTATACACATCTAGTGGCGCGCC<br>CTTGACAGCTCGTTCATGC | dFLEX <sup>FlpYpet</sup> -F0 |
| 151    | GATTTATCTCTCTCCGAGCTTGTCTCTTATACACATCTCCAGGCGCGCC<br>GTGTCCAAGGGCGAGG      |                              |

## Figure S5: dFLEX<sup>Flp</sup>mRuby2 related to STAR methods

### dFLEX<sup>mRuby2</sup>-F0

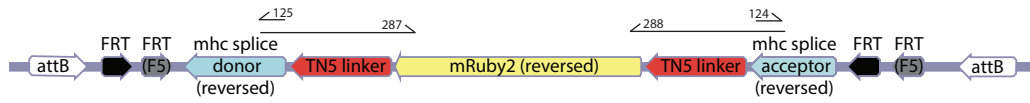

| Primer | Sequence                                                             | Template                     |
|--------|----------------------------------------------------------------------|------------------------------|
| 125    | GTAAGTTATTGAACAATGGC                                                 | dFLEX <sup>FlpYpet</sup> -F0 |
| 124    | CTGCGGAAGAGAGATAAATCG                                                |                              |
| 287    | GCCATTGTTCAATAACTTACCTGTCTTATACACATCTAGTGGCGCGCC<br>CTTGTACAGCTCGTCC | pcDNA3-mRuby2                |
| 288    | GATTTATCTCTTCCGCAGCTGTCTTATACACATCTCCAGGCGCGCCGTGTCTA<br>AGGGCGAAG   |                              |

### dFLEX<sup>mRuby2</sup>-F1

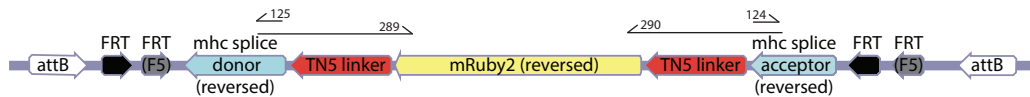

| Primer | Sequence                                                              | Template                     |
|--------|-----------------------------------------------------------------------|------------------------------|
| 125    | GTAAGTTATTGAACAATGGC                                                  | dFLEX <sup>FlpYpet</sup> -F0 |
| 124    | CTGCGGAAGAGAGATAAATCG                                                 |                              |
| 289    | GCCATTGTTCAATAACTTACCTAGTCTTATACACATCTAGTGGCGCGCCCTTGTA<br>CAGCTCGTCC | pcDNA3-mRuby2                |
| 290    | GATTTATCTCTTCCGCAGCTGCGTCTTATACACATCTCCAGGCGCGCCGTGTC<br>TAAGGGCGAAG  |                              |

### dFLEX<sup>mRuby2</sup>-F2

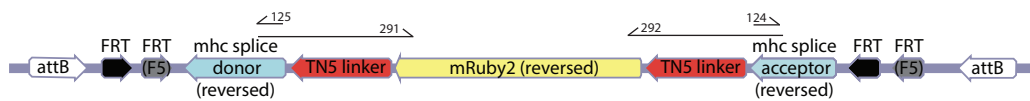

| Primer | Sequence                                                               | Template                     |
|--------|------------------------------------------------------------------------|------------------------------|
| 125    | GTAAGTTATTGAACAATGGC                                                   | dFLEX <sup>FlpYpet</sup> -F0 |
| 124    | CTGCGGAAGAGAGATAAATCG                                                  |                              |
| 291    | GCCATTGTTCAATAACTTACCTTAGTCTTATACACATCTAGTGGCGCGCCCTTGT<br>ACAGCTCGTCC | pcDNA3-mRuby2                |
| 292    | GATTTATCTCTTCCGCAGCTTGTCTTATACACATCTCCAGGCGCGCCGTGTCTA<br>AGGGCGAAG    |                              |

## Figure S6: dFLEX<sup>BOnStop</sup> and pJFRC-nSyb-Bxb1 related to STAR methods

### dFLEX<sup>BOnStop</sup>

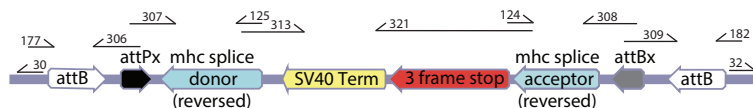

| Primer | Sequence                                                              | Template                                      |
|--------|-----------------------------------------------------------------------|-----------------------------------------------|
| 30     | CAGCACATCCCCCTTTCGCC                                                  | pBluescript                                   |
| 32     | GCTCTCCGCTTCCTCGCTC                                                   |                                               |
| 177    | GGCGAAAGGGGGATGTGCTGGCCTTTTTACGGTTCCTGGC                              | pJFRC18-8XLexAop2-mCD8::GFP                   |
| 306    | CCACTGAGACCGCGGTGGTTGACCAGACAAACCAC<br>TGGCGTACGGAGGAGACATC           |                                               |
| 182    | GAGCGAGGAAGCGGAAGAGCGATATCAGCTGGATGGCGATGTAG                          | pDONR(nORIENT)-attB-BRP-SNAP-UTR-ICRE-floxRFP |
| 309    | CGACGGAGACCGCCGTCGTCGACAAGCCG AAGTTATAGTGTAGCGGGCCCG                  |                                               |
| 307    | AACCACCGCGGTCTCAGTGGTGTACGGTACAAAACCA<br>AGAAGTTCAAATGGGCTTTCATATTTAC | dFLEX <sup>FlpYpet</sup> -F0                  |
| 125    | GTAAGTTATTGAACAATGGC                                                  |                                               |
| 313    | GCCATTGTTCAATAACTTACGATCCAGACATGATAAGATACATTGATG                      | pJFRC18-8XLexAop2-mCD8::GFP                   |
| 321    | GATTTATCTCTTCCGCAGTAAGTAAGTAAC<br>GGATCTTTGTGAAGGAACCTTACTTC          |                                               |
| 124    | CTGCGGAAGAGAGATAAAATCG                                                | dFLEX <sup>FlpYpet</sup> -F0                  |
| 308    | GACGACGGCGGTCTCCGTCGTCAGGATCATC AGTCGATCCAACATGGC                     |                                               |

### pJFRC-nSyb-Bxb1

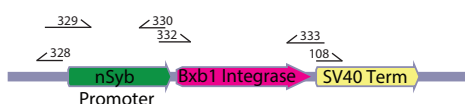

| Primer | Sequence                                  | Template                           |
|--------|-------------------------------------------|------------------------------------|
| 329    | GCTCCAATATATTTGTATATGGATCCGACCTCAAAGATG   | genomic DNA                        |
| 330    | CGGCTGTCGATGATTAGGAT                      |                                    |
| 332    | ATCCTAATCATCGACAGCCGCAAAC ATGCGAGCCCTGGTC | HeatShock-Hsp70Bb_Bxb1_Hsp70 BbUTR |
| 333    | CTTCACAAAGATCCTCTAGATTAGCTCATTCCGGTGTG    |                                    |
| 108    | TCTAGAGGATCTTTGTGAAG                      | pJFRC18-8XLexAop2-mCD8::GFP        |
| 328    | ATATACAAATATATTGGAGCAAATAAATTGTAC         |                                    |

## Figure S7: dFLEX-Drep2<sup>FOnYPet</sup> and dFLEX-Alk<sup>FOnYPet</sup> related to STAR methods

### dFLEX-Drep2<sup>FOnYPet</sup>

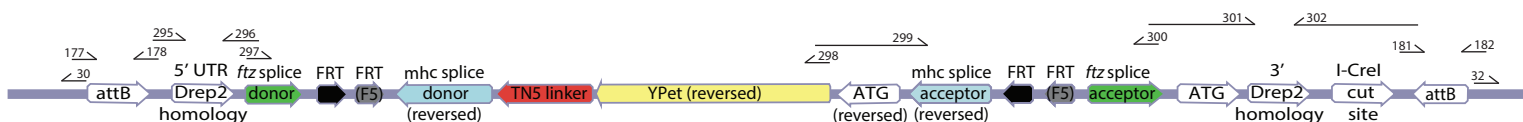

| Primer | Sequence                                                               | Template                                      |
|--------|------------------------------------------------------------------------|-----------------------------------------------|
| 30     | CAGCACATCCCCCTTTCGCC                                                   | pBluescript                                   |
| 32     | GCTCTTCCGCTTCTCGCTC                                                    |                                               |
| 177    | GGCGAAAGGGGGATGTGCTGGCCTTTTTACGGTTCCTGGC                               | pJFRC18-8XLexAop2-mCD8::GFP                   |
| 178    | TGGCGTACGGAGGAGACATCCGCCAGCGGTTTCG                                     |                                               |
| 181    | AAGTTATAGTGTAGCGGGCCGAGGTACCTGCAGCAGAGC                                | pDONR(nORIENT)-attB-BRP-SNAP-UTR-ICRE-floxRFP |
| 182    | GAGCGAGGAAGCGGAAGAGCGATATCAGCTGGATGGCGATGTAG                           |                                               |
| 295    | GATGTCTCCTCCGTACGCCAAATCAAATATACGTATATTAATCTGGG                        | genomic DNA                                   |
| 296    | TAATCGTGTGTGATGCCTACTACGACATGTTATCACCAGC                               |                                               |
| 297    | GTAGGCATCACACACGATTAAC                                                 | dFLEX <sup>FlpYpet</sup> -F0                  |
| 298    | GTGTCCAAGGGCGAG                                                        |                                               |
| 299    | AGCTCCTCGCCCTTGGACACCATCTGCGGAAGAGAGATAAATCG                           | dFLEX <sup>FlpYpet</sup> -F0                  |
| 300    | CTGTAAGCATAAGCAAAGAAAAAATGG                                            |                                               |
| 301    | TTCTTTGCTTATGCTTACAGATGGCCAGAGAGGTAAGTG                                | genomic DNA                                   |
| 302    | GGCCCGCTACACTATAACTTACCAAAGTCTCACGACGTTTTG<br>GATTTATTCATGCATCCTGTTGTG |                                               |

### dFLEX-Alk<sup>FOnYPet</sup>

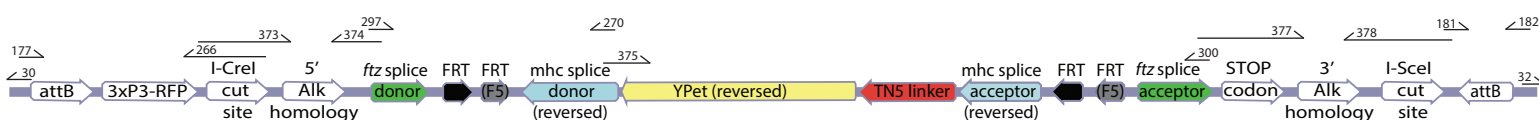

| Primer | Sequence                                                      | Template                                      |
|--------|---------------------------------------------------------------|-----------------------------------------------|
| 30     | CAGCACATCCCCCTTTCGCC                                          | pBluescript                                   |
| 32     | GCTCTTCCGCTTCTCGCTC                                           |                                               |
| 177    | GGCGAAAGGGGGATGTGCTGGCCTTTTTACGGTTCCTGGC                      | intermediate PCR fragment                     |
| 266    | CAAACGTCGTGAGACAGTTTGGTCTAGAGAGCTTCGCATGGTTTTGC               |                                               |
| 373    | ACCAAAGTCTCACGACGTTTTGACTGCTGGAATCCCAC                        | genomic DNA                                   |
| 374    | TAATCGTGTGTGATGCCTACCGCACAAGTATTCGGAATGATTG                   |                                               |
| 297    | GTAGGCATCACACACGATTAAC                                        | dFLEX <sup>FlpYpet</sup> -F0                  |
| 270    | GTGTCCAAGGGCGAG                                               |                                               |
| 375    | GCCATTGTTCAATAACTTACCTGTACAGCTCGTTCATGC                       | dFLEX <sup>FlpYpet</sup> -F0                  |
| 300    | CTGTAAGCATAAGCAAAGAAAAAATGG                                   |                                               |
| 377    | TTCTTTGCTTATGCTTACAG ATATAA AAACACTCGAAAGTTTGATACATTAAG       | genomic DNA                                   |
| 378    | GGCCCGCTACACTATAACTTATTACCCTGTTATCCCTA<br>CATTGATTGTGAGCATTAT |                                               |
| 181    | AAGTTATAGTGTAGCGGGCC CGAGGTACCTGCAGCAGAGC                     | pDONR(nORIENT)-attB-BRP-SNAP-UTR-ICRE-floxRFP |
| 182    | GAGCGAGGAAGCGGAAGAGC GATATCAGCTGGATGGCGATGTAG                 |                                               |

| Figure          | Genotype                                                                                                                                                                                                                              |
|-----------------|---------------------------------------------------------------------------------------------------------------------------------------------------------------------------------------------------------------------------------------|
| <b>Figure 1</b> |                                                                                                                                                                                                                                       |
| 1B              | <i>w; jeb<sup>2</sup> / Df(jeb), UAS-Jeb ; BF29<sup>VP16.AD</sup>, Cha(7.4kb)<sup>Gal4.DBD</sup> J8A1, UAS-Brp::RFP / +</i>                                                                                                           |
| 1D-E            | <i>w; Alk<sup>FOnYPet</sup> / UAS-Flp ; eyg-Gal4, 10xUAS-IVS-myr::mtdTomato2 @ attP2 / +</i>                                                                                                                                          |
| 1F              | <i>w; Alk<sup>FOnYPet</sup> / + ; RN2-Flp, tub84B-FRT-CD2.STOP-FRT-Gal4, 10xUAS-IVS-myr::mtdTomato2 @ attP2 / +</i>                                                                                                                   |
|                 |                                                                                                                                                                                                                                       |
| <b>Figure 2</b> |                                                                                                                                                                                                                                       |
| 2B+F-H          | <i>w; jeb<sup>2</sup>, UAS-Brp<sup>short</sup>::Strawberry / jeb<sup>BOnStop</sup> ; eyg-Gal4, 10xUAS-IVS-myr::mTurquoise2 @ attP2 / RN2-Flp, tub84B-FRT-STOP-FRT- LexA.VP16, 13xLexAOp2-IVS-myr::YPet @ attP2</i>                    |
| 2C+F-H          | <i>w; jeb<sup>2</sup>, UAS-Brp<sup>short</sup>::Strawberry / jeb<sup>BOnStop</sup>; eyg-Gal4, 10xUAS-IVS-myr::mTurquoise2 @ attP2, UAS-Bxb1 @ VK00027 / RN2-Flp, tub84B-FRT-STOP-FRT- LexA.VP16, 13xLexAOp2-IVS-myr::YPet @ attP2</i> |
| 2D+F-H          | <i>w; jeb<sup>2</sup>, Brp<sup>short</sup>::Strawberry / jeb<sup>BOnStop</sup> ; eyg-Gal4, 10xUAS-IVS-myr::mTurquoise2 @ attP2, nSyb-Bxb1 @ VK00027 / RN2-Flp, tub84B-FRT-STOP-FRT- LexA.VP16, 13xLexAOp2-IVS-myr::YPet @ attP2</i>   |
| 2E+F-G          | <i>w; UAS-Brp<sup>short</sup>::Strawberry / UAS-Alk<sup>DN</sup> ; eyg-Gal4, 10xUAS-IVS-myr::mTurquoise2 @ attP2, UAS-Bxb1 @ VK00027 / RN2-Flp<sub>A</sub>, tub84B-FRT-STOP-FRT- LexA.VP16, 13xLexAOp2-IVS-myr::YPet @ attP2</i>      |
|                 |                                                                                                                                                                                                                                       |
| <b>Figure 3</b> |                                                                                                                                                                                                                                       |
| 3A-D            | <i>w; jeb<sup>2</sup> / jeb<sup>BOnStop</sup> ; eyg-Gal4, 10xUAS-IVS-myr::mtdTomato2 @ attP2 / +</i>                                                                                                                                  |
| 3C+D            | <i>w; jeb<sup>2</sup> / jeb<sup>BOnStop</sup> ; eyg-Gal4, 10xUAS-IVS-myr::mtdTomato2 @ attP2, UAS-Bxb1 @ VK00027 / +</i>                                                                                                              |
|                 |                                                                                                                                                                                                                                       |
| <b>Figure 4</b> |                                                                                                                                                                                                                                       |
| 4A-E+H          | <i>w; Drep2<sup>FOnYPet</sup> / + ; RN2-Flp, tub84B-FRT-CD2.STOP-FRT-GAL4, 10xUAS-IVS-myr::mtdTomato2 @ attP2 / +</i>                                                                                                                 |
| 4F+H            | <i>w; Drep2<sup>FOnYPet</sup> / UAS-Alk<sup>DN</sup> ; RN2-Flp, tub84B-FRT-CD2.STOP-FRT-GAL4, 10xUAS-IVS-myr::mtdTomato2 @ attP2 / +</i>                                                                                              |
| 4G+H            | <i>w; jeb<sup>2</sup>, Drep2<sup>FOnYPet</sup> / jeb<sup>BOnStop</sup> ; RN2-Flp, tub84B-FRT-CD2.STOP-FRT-GAL4, 10xUAS-IVS-myr::mtdTomato2 @ attP2 / nSyb-Bxb1 @ VK00027</i>                                                          |
| 4H              | <i>w; jeb<sup>2</sup>, Drep2<sup>FOnYPet</sup> / + ; RN2-Flp, tub84B-FRT-CD2.STOP-FRT-GAL4, 10xUAS-IVS-myr::mtdTomato2 @ attP2 / nSyb-Bxb1 @ VK00027</i>                                                                              |
|                 |                                                                                                                                                                                                                                       |
| <b>Figure 5</b> |                                                                                                                                                                                                                                       |
| 5A,C-G,I-K      | <i>w; jeb<sup>2</sup> / jeb<sup>BOnStop</sup> ; RN2-Flp, tub84B-FRT-CD2.STOP-FRT-GAL4, 10xUAS-IVS-myr::mtdTomato2 @ attP2 / +</i>                                                                                                     |
| 5B-F,H-K        | <i>w; jeb<sup>2</sup> / jeb<sup>BOnStop</sup> ; RN2-Flp, tub84B-FRT-CD2.STOP-FRT-GAL4, 10xUAS-IVS-myr::mtdTomato2 @ attP2 / nSyb-Bxb1 @ VK00027</i>                                                                                   |
|                 |                                                                                                                                                                                                                                       |
| <b>Figure 6</b> |                                                                                                                                                                                                                                       |
| 6A+E            | <i>w; + / + ; RN2-Flp<sub>A</sub>, tub84B-FRT-STOP-FRT- LexVP16, 13xLexAOp2-IVS-myr::YPet @ attP2 / +</i>                                                                                                                             |
| 6B+E            | <i>w; jeb<sup>2</sup> / + ; RN2-Flp<sub>A</sub>, tub84B-FRT-STOP-FRT- LexVP16, 13xLexAOp2-IVS-myr::YPet @ attP2 / nSyb-Bxb1 @ VK00027</i>                                                                                             |
| 6C+E            | <i>w; jeb<sup>2</sup> / jeb<sup>BOnStop</sup> ; RN2-Flp<sub>A</sub>, tub84B-FRT-STOP-FRT- LexVP16 13xLexAOp2-IVS-myr::YPet @ attP2 / nSyb-Bxb1 @ VK00027</i>                                                                          |
| 6D+E            | <i>w; elav-Gal4 / UAS-Alk<sup>DN</sup> ; RN2-Flp<sub>A</sub>, tub84B-FRT-STOP-FRT- LexVP16, 13xLexAOp2-IVS-myr::YPet @ attP2 / +</i>                                                                                                  |

|                 |                                                                                                                                                               |
|-----------------|---------------------------------------------------------------------------------------------------------------------------------------------------------------|
| 6F+J            | <i>w; +/+; RN2-Flp<sub>C</sub>, tub84B-FRT-CD2.STOP-FRT-GAL4, 10xUAS-IVS-myr::mtdTomato2 @ attP2 / +</i>                                                      |
| 6G+J            | <i>w; + / UAS-Alk<sup>DN</sup>; RN2-Flp<sub>C</sub>, tub84B-FRT-CD2.STOP-FRT-GAL4, 10xUAS-IVS-myr::mtdTomato2 @ attP2 / +</i>                                 |
| 6H+J            | <i>w; + / UAS-Alk<sup>DN</sup>; RN2-Flp<sub>C</sub>, tub84B-FRT-CD2.STOP-FRT-GAL4, 10xUAS-IVS-myr::mtdTomato2 @ attP2 / UAS-Alk<sup>FL</sup></i>              |
| 6I+J            | <i>w; jeb<sup>2</sup> / jeb<sup>BOnStop</sup>; RN2-Flp<sub>C</sub>, tub84B-FRT-CD2.STOP-FRT-GAL4, 10xUAS-IVS-myr::mtdTomato2 @ attP2 / UAS-Bxb1 @ VK00027</i> |
|                 |                                                                                                                                                               |
| <b>Figure 7</b> |                                                                                                                                                               |
| 7A-G            | <i>w; +/+; RN2-Flp<sub>C</sub>, tub84B-FRT-CD2.STOP-FRT-GAL4, 10xUAS-IVS-myr::mtdTomato2 @ attP2 / +</i>                                                      |
| 7C-G            | <i>w; + / UAS-Alk<sup>DN</sup>; RN2-Flp<sub>C</sub>, tub84-FRT-STOP-FRT-Gal4, 10xUAS-IVS-myr::mtdTomato2 @ attP2 / +</i>                                      |
| 7C-G            | <i>w; jeb<sup>2</sup> / jeb<sup>BOnStop</sup>; RN2-Flp<sub>C</sub>, tub84-FRT-STOP-FRT-Gal4, 10xUAS-IVS-myr::mtdTomato2 @ attP2 / nSyb-Bxb1 @ VK00027</i>     |

| Figure           | Genotype                                                                                                                                                                                                                                                                                                                                                                                                                                                                                                                    |
|------------------|-----------------------------------------------------------------------------------------------------------------------------------------------------------------------------------------------------------------------------------------------------------------------------------------------------------------------------------------------------------------------------------------------------------------------------------------------------------------------------------------------------------------------------|
| <b>Figure S1</b> |                                                                                                                                                                                                                                                                                                                                                                                                                                                                                                                             |
| S1A              | <i>Oregon R</i>                                                                                                                                                                                                                                                                                                                                                                                                                                                                                                             |
| S1B-G            | <i>w; jeb-T2A-Gal4 / UAS-StingerGFP; +/+</i>                                                                                                                                                                                                                                                                                                                                                                                                                                                                                |
| S1I              | <i>w, Alk<sup>YPet</sup> / +; +/+</i>                                                                                                                                                                                                                                                                                                                                                                                                                                                                                       |
| S1J              | <i>w; Alk<sup>FOnYPet</sup> / UAS-Flp; nSyb-GAL4 @ attP2</i>                                                                                                                                                                                                                                                                                                                                                                                                                                                                |
| S1K              | <i>w; Alk<sup>FOnYPet</sup> / UAS-Flp; repo-GAL4</i>                                                                                                                                                                                                                                                                                                                                                                                                                                                                        |
|                  |                                                                                                                                                                                                                                                                                                                                                                                                                                                                                                                             |
| <b>Figure S2</b> |                                                                                                                                                                                                                                                                                                                                                                                                                                                                                                                             |
| S2B              | <i>w; jeb<sup>2</sup> / jeb<sup>BOnStop</sup>; UAS-Bxb1 @ VK00027 / +</i>                                                                                                                                                                                                                                                                                                                                                                                                                                                   |
| S2C              | <i>w; jeb<sup>2</sup> / jeb<sup>BOnStop</sup>; mef2-Gal4 / UAS-Bxb1 @ VK00027</i>                                                                                                                                                                                                                                                                                                                                                                                                                                           |
| SD+E             | <i>w; UAS-Brp<sup>short</sup>::Strawberry / +; eyg-Gal4, 10xUAS-IVS-myr::mTurquoise2 @ attP2, UAS-Bxb1 @ VK00027 / +</i><br><i>w; UAS-Brp<sup>short</sup>::Strawberry / +; eyg-Gal4, 10xUAS-IVS-myr::mTurquoise2 @ attP2, nSyb-Bxb1 @ VK00027 / +</i><br><i>w; jeb<sup>2</sup>, UAS-Brp<sup>short</sup>::Strawberry / +; eyg-Gal4, 10xUAS-IVS-myr::mTurquoise2 @ attP2 / +</i><br><i>w; jeb<sup>2</sup>, UAS-Brp<sup>short</sup>::Strawberry / jeb<sup>BOnStop</sup>; eyg-Gal4, 10xUAS-IVS-myr::mTurquoise2 @ attP2 / +</i> |
| S2F              | <i>w; UAS-Flp, Brp<sup>FOnmRuby2</sup> / UAS-Syd1<sup>GFP</sup>; eyg-Gal4, 10xUAS-IVS-myr::mTurquoise2 @ attP2 / +</i>                                                                                                                                                                                                                                                                                                                                                                                                      |
|                  |                                                                                                                                                                                                                                                                                                                                                                                                                                                                                                                             |
| <b>Figure S3</b> |                                                                                                                                                                                                                                                                                                                                                                                                                                                                                                                             |
| S3B              | <i>w; UAS-Flp, Brp<sup>FOnYPet</sup> / +; ChAT-T2A-Gal4 / +</i>                                                                                                                                                                                                                                                                                                                                                                                                                                                             |
| S3C              | <i>w; UAS-Flp, Brp<sup>FOnYPet</sup> / +; Gad1-T2A-Gal4 / +</i>                                                                                                                                                                                                                                                                                                                                                                                                                                                             |
| S3E+G            | <i>w; Drep2<sup>FOnYPet</sup> / +; RN2-Flp<sub>C</sub>, tub84B-FRT-CD2.STOP-FRT-GAL4, 10xUAS-IVS-myr::mtdTomato2 @ attP2 / +</i>                                                                                                                                                                                                                                                                                                                                                                                            |
| S3F+G            | <i>w; UAS-Drep2<sup>GFP</sup> / +; RN2-Flp<sub>C</sub>, tub84B-FRT-CD2.STOP-FRT-GAL4, 10xUAS-IVS-myr::mtdTomato2 @ attP2 / +</i>                                                                                                                                                                                                                                                                                                                                                                                            |
| S3G              | <i>w; +/+; RN2-Flp<sub>C</sub>, tub84B-FRT-CD2.STOP-FRT-GAL4, 10xUAS-IVS-myr::mtdTomato2 @ attP2 / +</i>                                                                                                                                                                                                                                                                                                                                                                                                                    |
| S3H              | <i>w; Drep2<sup>FOnYPet</sup> / +; RN2-Flp<sub>C</sub>, tub84B-FRT-CD2.STOP-FRT-GAL4, 10xUAS-IVS-myr::mtdTomato2 @ attP2 / +</i><br><i>w; Drep2<sup>FOnYPet</sup> / UAS-Alk<sup>DN</sup>; RN2-Flp<sub>C</sub>, tub84B-FRT-CD2.STOP-FRT-GAL4, 10xUAS-IVS-myr::mtdTomato2 @ attP2 / +</i>                                                                                                                                                                                                                                     |

**Table S1:** Experimental genotypes
